# Supplementary material for: Generation of (E)-β-sulfonyl enamines from sulfur dioxide via a radical process
Source: Royal Society of Chemistry journal article supplement (doi:10.1039/d0qo01551b), 2021-01-01

# Generation of (*E*)- $\beta$ -sulfonyl enamines from sulfur dioxide via a radical process

Xiaodong Tu, Jiapian Huang, Wenlin Xie,\* Tonghao Zhu\* and Jie Wu\*

## Supporting Information

1. General experimental methods (S2).
2. General experimental procedure (S2)
3. Table S1: Optimization of reaction conditions (S3).
4. Characterization data (S4)
5.  $^1\text{H}$  and  $^{13}\text{C}$  NMR spectra of compounds **3** (S14-S39).

## General experimental methods:

Unless otherwise stated, all commercial reagents were used as received. All solvents were dried and distilled according to standard procedures. Flash column chromatography was performed using silica gel (60-Å pore size, 32-63  $\mu\text{m}$ , standard grade). Analytical thin-layer chromatography was performed using glass plates pre-coated with 0.25 mm 230-400 mesh silica gel impregnated with a fluorescent indicator (254 nm). Thin layer chromatography plates were visualized by exposure to ultraviolet light. Organic solutions were concentrated on rotary evaporators at  $\sim 20$  Torr at 25-35  $^{\circ}\text{C}$ . Nuclear magnetic resonance (NMR) spectra are recorded in parts per million from internal tetramethylsilane on the  $\delta$  scale.  $^1\text{H}$  and  $^{13}\text{C}$  NMR spectra were recorded in  $\text{CDCl}_3$  on a Bruker DRX-400 spectrometer operating at 400 MHz and 100 MHz, respectively. All chemical shift values are quoted in ppm and coupling constants quoted in Hz. High resolution mass spectrometry (HRMS) spectra were obtained on a micrOTOF II Instrument.

*General experimental procedure for the iron(II)-catalyzed reaction of N-vinylacetamides 1, cyclobutanone O-perfluorobenzoyl oximes 2 and DABCO $\cdot$ (SO $_2$ ) $_2$ .*

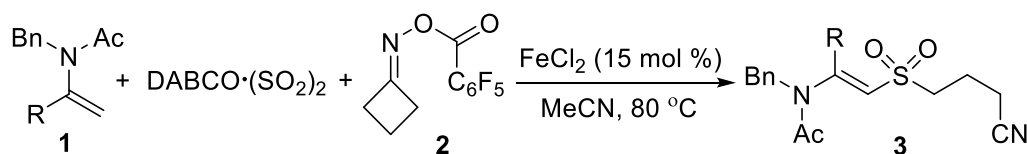

Cyclobutanone *O*-perfluorobenzoyl oxime **2** (0.45 mmol) was added to a mixture of DABCO $\cdot$ (SO $_2$ ) $_2$  (0.45 mmol), *N*-benzyl-*N*-(1-phenylvinyl)acetamide **1** (0.3 mmol) and FeCl<sub>2</sub> (15 mol %) in CH<sub>3</sub>CN (1.5 mL) at 80  $^{\circ}\text{C}$  under N<sub>2</sub> atmosphere. The mixture was stirred for 12 hours. After completion of reaction as indicated by TLC, the solvent was evaporated and the residue was purified directly by flash column chromatography (*n*-hexane/ethyl acetate = 1:1) to give the corresponding product **3**.

Table S1. Optimization of reaction conditions <sup>a</sup>

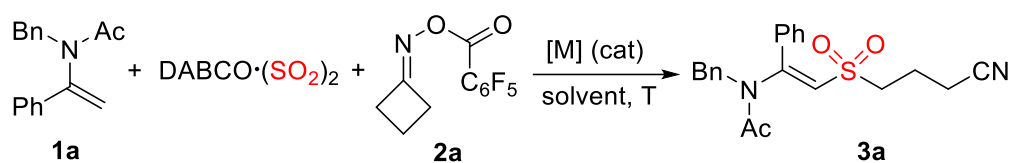

| Entry | [M]                                          | Solvent | T (°C) | Yield (%) <sup>b</sup> |
|-------|----------------------------------------------|---------|--------|------------------------|
| 1     | CuCl (10 mol %)                              | DMF     | 50     | Trace                  |
| 2     | Fe(acac) <sub>3</sub> (10 mol %)             | DMF     | 50     | 16                     |
| 3     | Fe(NO <sub>3</sub> ) <sub>3</sub> (10 mol %) | DMF     | 50     | 10                     |
| 4     | Fe(OTf) <sub>3</sub> (10 mol %)              | DMF     | 50     | 12                     |
| 5     | FeCl <sub>3</sub> (10 mol %)                 | DMF     | 50     | 37                     |
| 6     | FeSO <sub>4</sub> (10 mol %)                 | DMF     | 50     | 9                      |
| 7     | FeBr <sub>2</sub> (10 mol %)                 | DMF     | 50     | trace                  |
| 8     | FeCl <sub>2</sub> (10 mol %)                 | DMF     | 50     | 45                     |
| 9     | Fe(OAc) <sub>2</sub> (10 mol %)              | DMF     | 50     | trace                  |
| 10    | Fe(OTf) <sub>2</sub> (10 mol %)              | DMF     | 50     | 12                     |
| 11    | FeCl <sub>2</sub> (5 mol %)                  | DMF     | 50     | 23                     |
| 12    | FeCl <sub>2</sub> (15 mol %)                 | DMF     | 50     | 55                     |
| 13    | FeCl <sub>2</sub> (20 mol %)                 | DMF     | 50     | 51                     |
| 14    | FeCl <sub>2</sub> (15 mol %)                 | DMSO    | 50     | 14                     |
| 15    | FeCl <sub>2</sub> (15 mol %)                 | MeCN    | 50     | 75                     |
| 16    | FeCl <sub>2</sub> (15 mol %)                 | toluene | 50     | 54                     |
| 17    | FeCl <sub>2</sub> (15 mol %)                 | DMA     | 50     | 20                     |
| 18    | FeCl <sub>2</sub> (15 mol %)                 | NMP     | 50     | 25                     |
| 19    | FeCl <sub>2</sub> (15 mol %)                 | dioxane | 50     | 47                     |
| 20    | FeCl <sub>2</sub> (15 mol %)                 | MeCN    | 25     | 62                     |
| 21    | FeCl <sub>2</sub> (15 mol %)                 | MeCN    | 80     | 82 (78)                |
| 22    | FeCl <sub>2</sub> (15 mol %)                 | MeCN    | 110    | 72                     |

<sup>a</sup> Reaction conditions: *N*-benzyl-*N*-(1-phenylvinyl)acetamide **1a** (0.3 mmol), cyclobutanone *O*-perfluorobenzoyl oxime **2a** (0.45 mmol, 1.5 equiv), DABCO·(SO<sub>2</sub>)<sub>2</sub>

(0.45 mmol, 1.5 equiv), catalyst (15 mol %), , solvent (1.5 mL), N<sub>2</sub>, 80 °C, 12 h. <sup>b</sup> <sup>1</sup>H NMR yield using 1,3,5-trimethoxybenzene as internal standard (Isolated yield in parentheses).

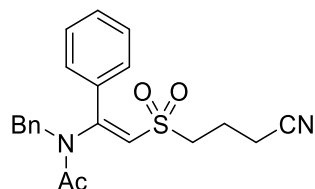

(*E*)-*N*-benzyl-*N*-(2-((3-cyanopropyl)sulfonyl)-1-phenylvinyl)acetamide (**3a**)

Purification by flash chromatography (*n*-hexane/ethyl acetate = 1:1) afforded **3a**. Colorless oil; 89.4 mg, 78% yield; <sup>1</sup>H NMR (400 MHz, CDCl<sub>3</sub>) δ 7.51-7.57 (m, 1H), 7.43-7.50 (m, 4H), 7.27-7.38 (m, 3H), 7.14-7.20 (m, 2H), 6.18 (s, 1H), 4.65 (s, 2H), 2.82 (t, *J* = 7.3 Hz, 2H), 2.42 (t, *J* = 7.0 Hz, 2H), 2.19 (s, 3H), 1.91-2.02 (m, 2H); <sup>13</sup>C NMR (100 MHz, CDCl<sub>3</sub>) δ 170.5, 153.1, 136.2, 132.1, 131.8, 129.8, 128.9, 128.8, 128.1, 128.0, 125.0, 117.9, 53.1, 50.9, 23.5, 18.4, 16.1; HRMS (ESI) calcd for C<sub>21</sub>H<sub>22</sub>N<sub>2</sub>O<sub>3</sub>SNa [M+Na]<sup>+</sup>: 405.1243, found: 405.1245.

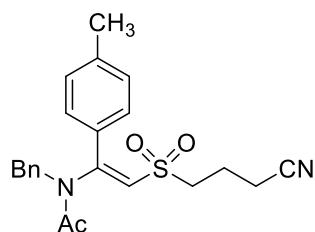

(*E*)-*N*-benzyl-*N*-(2-((3-cyanopropyl)sulfonyl)-1-(*p*-tolyl)vinyl)acetamide (**3b**)

Purification by flash chromatography (*n*-hexane/ethyl acetate = 1:1) afforded **3b**. Colorless oil; 102.3 mg, 86% yield; <sup>1</sup>H NMR (400 MHz, CDCl<sub>3</sub>) δ 7.31-7.38 (m, 5H), 7.27-7.31 (m, 2H), 7.15-7.20 (m, 2H), 6.11 (s, 1H), 4.65 (s, 2H), 2.81 (t, *J* = 7.3 Hz, 2H), 2.42 (t, *J* = 7.0 Hz, 5H), 2.17 (s, 3H), 1.92-2.01 (m, 2H); <sup>13</sup>C NMR (100 MHz, CDCl<sub>3</sub>) δ 170.5, 153.3, 142.6, 136.3, 129.8, 129.5, 129.2, 128.9, 128.2, 128.0, 124.4, 118.0, 53.0, 50.9, 23.5, 21.6, 18.4, 16.1; HRMS (ESI) calcd for C<sub>22</sub>H<sub>24</sub>N<sub>2</sub>O<sub>3</sub>SNa [M+Na]<sup>+</sup>: 419.1400, found: 419.1409.

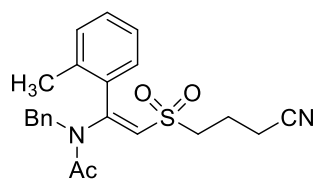

(*E*)-*N*-benzyl-*N*-(2-((3-cyanopropyl)sulfonyl)-1-(*o*-tolyl)vinyl)acetamide (**3c**)

Purification by flash chromatography (*n*-hexane/ethyl acetate = 1:1) afforded **3c**. Colorless oil; 104.6 mg, 88% yield; <sup>1</sup>H NMR (400 MHz, CDCl<sub>3</sub>) δ 7.35-7.41 (m, 1H), 7.28-7.35 (m, 2H), 7.18-7.28 (m, 3H), 7.10-7.15 (m, 1H), 7.03-7.09 (m, 2H), 6.53 (s, 1H), 4.54 (s, 2H), 2.90 (t, *J* = 7.3 Hz, 2H), 2.43 (t, *J* = 7.1 Hz, 2H), 2.29 (s, 3H), 2.24 (s, 3H), 1.99-2.10 (m, 2H); <sup>13</sup>C NMR (100 MHz, CDCl<sub>3</sub>) δ 171.0, 152.8, 136.9, 136.3, 131.1, 130.8, 130.8, 130.6, 128.8, 127.6, 126.7, 125.6, 122.8, 118.1, 53.6, 50.3, 23.7, 19.5, 18.5, 15.9; HRMS (ESI) calcd for C<sub>22</sub>H<sub>24</sub>N<sub>2</sub>O<sub>3</sub>SNa [M+Na]<sup>+</sup>: 419.1400, found: 419.1404.

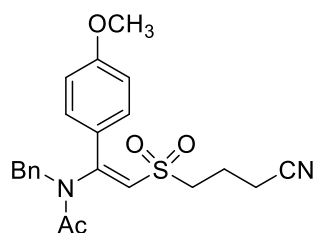

(*E*)-*N*-benzyl-*N*-(2-((3-cyanopropyl)sulfonyl)-1-(4-methoxyphenyl)vinyl)acetamide (**3d**)

Purification by flash chromatography (*n*-hexane/ethyl acetate = 1:1) afforded **3d**. Colorless oil; 104.0 mg, 84% yield; <sup>1</sup>H NMR (400 MHz, CDCl<sub>3</sub>) δ 7.39-7.46 (m, 2H), 7.27-7.37 (m, 3H), 7.15-7.21 (m, 2H), 6.92-6.99 (m, 2H), 6.07 (s, 1H), 4.66 (s, 2H), 3.85 (s, 3H), 2.84 (t, *J* = 7.3 Hz, 2H), 2.41 (t, *J* = 7.0 Hz, 2H), 2.14 (s, 3H), 1.89-1.99 (m, 2H); <sup>13</sup>C NMR (100 MHz, CDCl<sub>3</sub>) δ 170.5, 162.3, 152.8, 136.3, 131.6, 128.7, 128.1, 127.8, 124.0, 123.4, 118.0, 114.1, 55.3, 52.8, 50.9, 23.3, 18.3, 15.9; HRMS (ESI) calcd for C<sub>22</sub>H<sub>24</sub>N<sub>2</sub>O<sub>4</sub>SNa [M+Na]<sup>+</sup>: 435.1349, found: 435.1353.

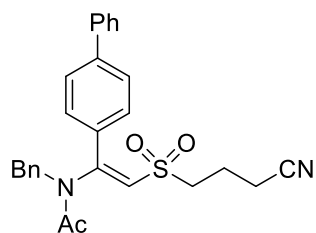

(*E*)-*N*-(1-([1,1'-biphenyl]-4-yl)-2-((3-cyanopropyl)sulfonyl)vinyl)-*N*-benzylacetamide (**3e**)

Purification by flash chromatography (*n*-hexane/ethyl acetate = 1:1) afforded **3e**. Colorless oil; 114.2 mg, 83% yield; <sup>1</sup>H NMR (400 MHz, CDCl<sub>3</sub>) δ 7.61-7.72 (m, 4H), 7.51-7.56 (m, 2H), 7.44-7.50 (m, 2H), 7.27-7.43 (m, 4H), 7.17-7.23 (m, 2H), 6.18 (s, 1H), 4.69 (s, 2H), 2.89 (t, *J* = 7.3 Hz, 2H), 2.44 (t, *J* = 7.0 Hz, 2H), 2.21 (s, 3H), 1.94-2.03 (m, 2H); <sup>13</sup>C NMR (100 MHz, CDCl<sub>3</sub>) δ 170.5, 152.8, 144.5, 139.3, 136.3, 130.7, 130.3, 128.9, 128.9, 128.3, 128.2, 128.0, 127.3, 127.2, 124.9, 118.0, 53.1, 51.0, 23.4, 18.5, 16.1; HRMS (ESI) calcd for C<sub>27</sub>H<sub>26</sub>N<sub>2</sub>O<sub>3</sub>SNa [M+Na]<sup>+</sup>: 481.1556, found: 481.1569.

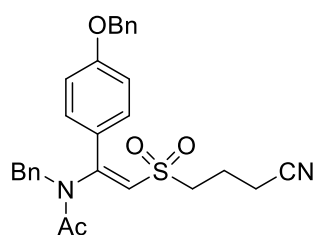

(*E*)-*N*-benzyl-*N*-(1-(4-(benzyloxy)phenyl)-2-((3-cyanopropyl)sulfonyl)vinyl)acetamide (**3f**)

Purification by flash chromatography (*n*-hexane/ethyl acetate = 1:1) afforded **3f**. Colorless oil; 98.2 mg, 67% yield; <sup>1</sup>H NMR (400 MHz, CDCl<sub>3</sub>) δ 7.37-7.46 (m, 6H), 7.26-7.37 (m, 4H), 7.14-7.20 (m, 2H), 7.01-7.06 (m, 2H), 6.06 (s, 1H), 5.10 (s, 2H), 4.66 (s, 2H), 2.82 (t, *J* = 7.3 Hz, 2H), 2.40 (t, *J* = 7.0 Hz, 2H), 2.14 (s, 3H), 1.89-1.99 (m, 2H); <sup>13</sup>C NMR (100 MHz, CDCl<sub>3</sub>) δ 170.5, 161.5, 152.7, 136.3, 135.9, 131.6, 128.7, 128.6, 128.2, 128.2, 127.9, 127.5, 124.2, 123.6, 118.0, 114.9, 52.9, 50.9, 23.4, 18.3, 16.0; HRMS (ESI) calcd for C<sub>28</sub>H<sub>28</sub>N<sub>2</sub>O<sub>4</sub>SNa [M+Na]<sup>+</sup>: 511.1662, found: 511.1666.

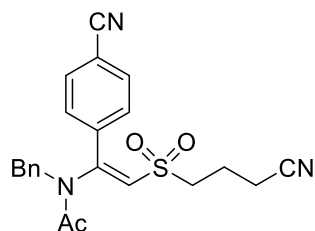

(*E*)-*N*-benzyl-*N*-(1-(4-cyanophenyl)-2-((3-cyanopropyl)sulfonyl)vinyl)acetamide (**3g**)

Purification by flash chromatography (*n*-hexane/ethyl acetate = 1:1) afforded **3g**. Colorless oil; 51.3 mg, 42% yield; <sup>1</sup>H NMR (400 MHz, CDCl<sub>3</sub>) δ 7.69-7.75 (m, 2H), 7.48-7.53 (m, 2H), 7.31-7.39 (m, 3H), 7.09-7.15 (m, 2H), 6.36 (s, 1H), 4.61 (s, 2H), 2.97 (t, *J* = 7.4 Hz, 2H), 2.48 (t, *J* = 6.9 Hz, 2H), 2.25 (s, 3H), 1.98-2.08 (m, 2H); <sup>13</sup>C NMR (100 MHz,

CDCl<sub>3</sub>) δ 170.4, 151.0, 136.5, 135.6, 132.0, 130.4, 129.1, 128.3, 127.6, 125.9, 117.9, 117.7, 114.9, 53.6, 51.2, 23.3, 18.3, 16.0; HRMS (ESI) calcd for C<sub>22</sub>H<sub>21</sub>N<sub>2</sub>O<sub>3</sub>SNa [M+Na]<sup>+</sup>: 430.1196, found: 430.1203.

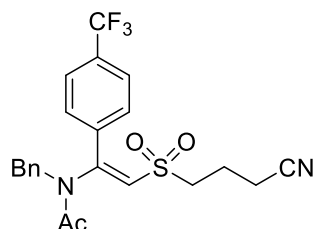

(*E*)-*N*-benzyl-*N*-(2-((3-cyanopropyl)sulfonyl)-1-(4-(trifluoromethyl)phenyl)vinyl)acetamide (**3h**)

Purification by flash chromatography (*n*-hexane/ethyl acetate = 1:1) afforded **3h**. Colorless oil; 77.0 mg, 57% yield; <sup>1</sup>H NMR (400 MHz, CDCl<sub>3</sub>) δ 7.70 (d, *J* = 8.0 Hz, 2H), 7.53 (d, *J* = 8.1 Hz, 2H), 7.28-7.39 (m, 3H), 7.13 (d, *J* = 6.9 Hz, 2H), 6.33 (s, 1H), 4.61 (s, 2H), 2.94 (t, *J* = 7.3 Hz, 2H), 2.42-2.50 (m, 2H), 2.24 (s, 3H), 1.96-2.07 (m, 2H); <sup>13</sup>C NMR (100 MHz, CDCl<sub>3</sub>) δ 170.4, 151.5, 135.8, 135.6, 133.03 (q, *J* = 32.6 Hz), 130.2, 129.0, 128.1, 127.8, 125.9, 125.43 (q, *J* = 3.7 Hz), 123.41 (q, *J* = 271.0 Hz), 117.9, 53.5, 51.0, 23.3, 18.4, 16.0; <sup>19</sup>F NMR (376 MHz, CDCl<sub>3</sub>) δ -62.96; HRMS (ESI) calcd for C<sub>22</sub>H<sub>21</sub>F<sub>3</sub>N<sub>2</sub>O<sub>3</sub>SNa [M+Na]<sup>+</sup>: 473.1117, found: 473.1125.

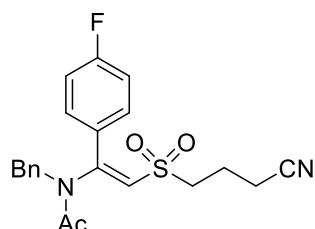

(*E*)-*N*-benzyl-*N*-(2-((3-cyanopropyl)sulfonyl)-1-(4-fluorophenyl)vinyl)acetamide (**3i**)

Purification by flash chromatography (*n*-hexane/ethyl acetate = 1:1) afforded **3i**. Colorless oil; 91.2 mg, 76% yield; <sup>1</sup>H NMR (400 MHz, CDCl<sub>3</sub>) δ 7.42-7.48 (m, 2H), 7.30-7.38 (m, 3H), 7.12-7.18 (m, 4H), 6.18 (s, 1H), 4.64 (s, 2H), 2.89 (t, *J* = 7.3 Hz, 2H), 2.47 (t, *J* = 7.0 Hz, 2H), 2.20 (s, 3H), 1.96-2.06 (m, 2H); <sup>13</sup>C NMR (100 MHz, CDCl<sub>3</sub>) δ 170.5, 164.59 (d, *J* = 252.0 Hz), 152.1, 136.1, 132.10 (d, *J* = 8.9 Hz), 129.0, 128.1, 128.0, 124.9, 117.9, 116.06 (d, *J* = 22.0 Hz), 53.3, 51.0, 23.4, 18.4, 16.1; <sup>19</sup>F NMR (376 MHz, CDCl<sub>3</sub>) δ -106.60-106.35 (m); HRMS (ESI) calcd for C<sub>21</sub>H<sub>21</sub>FN<sub>2</sub>O<sub>3</sub>SNa [M+Na]<sup>+</sup>: 423.1149, found:

423.1158.

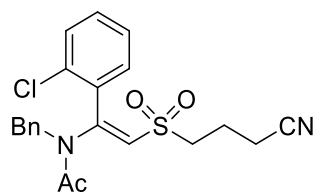

(*E*)-*N*-benzyl-*N*-(1-(2-chlorophenyl)-2-((3-cyanopropyl)sulfonyl)vinyl)acetamide (**3j**)

Purification by flash chromatography (*n*-hexane/ethyl acetate = 1:1) afforded **3j**. Colorless oil; 85.1 mg, 68% yield; <sup>1</sup>H NMR (400 MHz, CDCl<sub>3</sub>) δ 7.47-7.52 (m, 1H), 7.28-7.42 (m, 6H), 7.12-7.17 (m, 2H), 6.25 (s, 1H), 4.61 (s, 2H), 2.91 (t, *J* = 7.3 Hz, 2H), 2.45 (t, *J* = 7.0 Hz, 2H), 2.22 (s, 3H), 1.97-2.04 (m, 2H); <sup>13</sup>C NMR (100 MHz, CDCl<sub>3</sub>) δ 170.3, 151.4, 136.0, 134.6, 133.7, 131.5, 129.8, 129.2, 128.8, 128.2, 128.0, 127.8, 125.6, 118.0, 53.3, 50.9, 23.3, 18.3, 16.0; HRMS (ESI) calcd for C<sub>21</sub>H<sub>21</sub>ClN<sub>2</sub>O<sub>3</sub>SNa [M+Na]<sup>+</sup>: 439.0854, found: 439.0857.

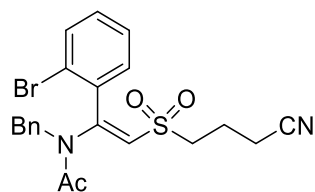

(*E*)-*N*-benzyl-*N*-(1-(2-bromophenyl)-2-((3-cyanopropyl)sulfonyl)vinyl)acetamide (**3k**)

Purification by flash chromatography (*n*-hexane/ethyl acetate = 1:1) afforded **3k**. Colorless oil; 70.6 mg, 51% yield; <sup>1</sup>H NMR (400 MHz, CDCl<sub>3</sub>) δ 7.60-7.66 (m, 1H), 7.26-7.37 (m, 5H), 7.21-7.25 (m, 1H), 7.02-7.08 (m, 2H), 6.59 (s, 1H), 4.56 (s, 2H), 2.99 (t, *J* = 7.3 Hz, 2H), 2.49 (t, *J* = 7.0 Hz, 2H), 2.35 (s, 3H), 2.10-2.20 (m, 2H); <sup>13</sup>C NMR (100 MHz, CDCl<sub>3</sub>) δ 171.1, 151.8, 136.2, 134.3, 133.1, 132.1, 132.1, 128.9, 127.7, 126.9, 126.5, 122.9, 121.5, 118.1, 53.8, 50.9, 23.8, 18.7, 16.0; HRMS (ESI) calcd for C<sub>21</sub>H<sub>21</sub>BrN<sub>2</sub>O<sub>3</sub>SNa [M+Na]<sup>+</sup>: 483.0359, found: 483.0359.

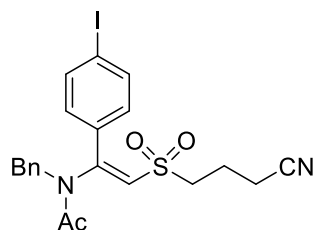

(*E*)-*N*-benzyl-*N*-(2-((3-cyanopropyl)sulfonyl)-1-(4-iodophenyl)vinyl)acetamide (**3l**)

Purification by flash chromatography (*n*-hexane/ethyl acetate = 1:1) afforded **3l**.



Colorless oil; 100.7 mg, 66% yield;  $^1\text{H}$  NMR (400 MHz,  $\text{CDCl}_3$ )  $\delta$  7.75-7.82 (m, 2H), 7.28-7.37 (m, 3H), 7.10-7.17 (m, 4H), 6.22 (s, 1H), 4.60 (s, 2H), 2.90 (t,  $J = 7.3$  Hz, 2H), 2.41-2.47 (m, 2H), 2.19 (s, 3H), 1.91-2.02 (m, 2H);  $^{13}\text{C}$  NMR (100 MHz,  $\text{CDCl}_3$ )  $\delta$  170.4, 152.1, 137.9, 136.0, 131.4, 131.2, 128.9, 128.1, 127.9, 125.1, 117.9, 98.7, 53.3, 51.0, 23.4, 18.4, 16.1; HRMS (ESI) calcd for  $\text{C}_{21}\text{H}_{21}\text{N}_2\text{O}_3\text{SNa}$   $[\text{M}+\text{Na}]^+$ : 531.0210, found: 531.0217.

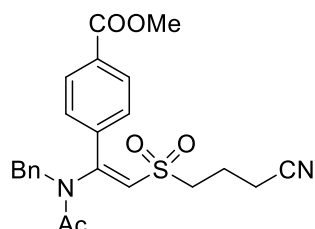

Methyl (*E*)-4-(1-(*N*-benzylacetamido)-2-((3-cyanopropyl)sulfonyl)vinyl)benzoate (**3m**)

Purification by flash chromatography (*n*-hexane/ethyl acetate = 1:1) afforded **3m**.

Colorless oil; 81.9 mg, 62% yield;  $^1\text{H}$  NMR (400 MHz,  $\text{CDCl}_3$ )  $\delta$  8.11 (d,  $J = 8.1$  Hz, 2H), 7.49 (d,  $J = 8.2$  Hz, 2H), 7.28-7.40 (m, 3H), 7.11-7.17 (m, 2H), 6.29 (s, 1H), 4.61 (s, 2H), 3.95 (s, 3H), 2.90 (t,  $J = 7.3$  Hz, 2H), 2.45 (t,  $J = 7.0$  Hz, 2H), 2.23 (s, 3H), 1.95-2.05 (m, 2H);  $^{13}\text{C}$  NMR (100 MHz,  $\text{CDCl}_3$ )  $\delta$  170.4, 165.9, 152.0, 136.3, 135.9, 132.7, 129.8, 129.6, 129.0, 128.1, 127.9, 125.6, 117.9, 53.4, 52.4, 51.0, 23.4, 18.4, 16.0; HRMS (ESI) calcd for  $\text{C}_{23}\text{H}_{24}\text{N}_2\text{O}_5\text{SNa}$   $[\text{M}+\text{Na}]^+$ : 463.1298, found: 463.1302.

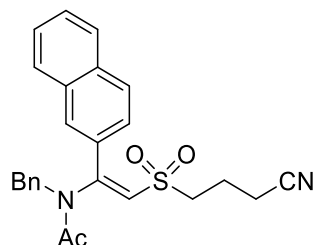

(*E*)-*N*-benzyl-*N*-(2-((3-cyanopropyl)sulfonyl)-1-(naphthalen-2-yl)vinyl)acetamide (**3n**)

Purification by flash chromatography (*n*-hexane/ethyl acetate = 1:1) afforded **3n**.

Colorless oil; 111.6 mg, 86% yield;  $^1\text{H}$  NMR (400 MHz,  $\text{CDCl}_3$ )  $\delta$  7.87-8.01 (m, 4H), 7.53-7.63 (m, 2H), 7.44-7.50 (m, 1H), 7.28-7.38 (m, 3H), 7.15-7.21 (m, 2H), 6.27 (s, 1H), 4.67 (s, 2H), 2.84 (t,  $J = 7.3$  Hz, 2H), 2.37 (t,  $J = 7.0$  Hz, 2H), 2.23 (s, 3H), 1.90-2.00 (m, 2H);  $^{13}\text{C}$  NMR (100 MHz,  $\text{CDCl}_3$ )  $\delta$  170.5, 153.1, 136.3, 134.4, 132.3, 131.0, 129.2, 128.9, 128.6, 128.2, 128.1, 128.0, 127.8, 127.2, 125.4, 125.2, 118.0, 53.2, 51.0, 23.5, 18.5, 16.0; HRMS (ESI) calcd for  $\text{C}_{25}\text{H}_{24}\text{N}_2\text{O}_3\text{SNa}$   $[\text{M}+\text{Na}]^+$ : 455.1400, found: 455.1408.

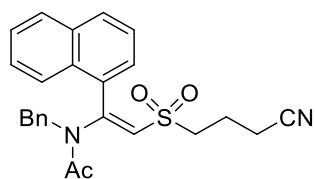

(*E*)-*N*-benzyl-*N*-(2-((3-cyanopropyl)sulfonyl)-1-(naphthalen-1-yl)vinyl)acetamide (**3o**)

Purification by flash chromatography (*n*-hexane/ethyl acetate = 1:1) afforded **3o**. Colorless oil; 116.8 mg, 90% yield; <sup>1</sup>H NMR (400 MHz, CDCl<sub>3</sub>) δ 7.89-8.00 (m, 2H), 7.70-7.77 (m, 1H), 7.52-7.58 (m, 2H), 7.37-7.48 (m, 2H), 7.26-7.35 (m, 3H), 7.00-7.06 (m, 2H), 6.86 (s, 1H), 4.40 (d, *J* = 87.0 Hz, 2H), 2.77 (s, 2H), 2.33 (s, 3H), 2.26 (t, *J* = 7.1 Hz, 2H), 1.98-2.09 (m, 2H); <sup>13</sup>C NMR (100 MHz, CDCl<sub>3</sub>) δ 171.3, 151.3, 136.3, 133.2, 131.4, 130.8, 130.8, 129.0, 128.9, 128.3, 127.8, 127.7, 126.7, 126.4, 125.3, 124.7, 123.5, 118.0, 53.4, 50.8, 23.9, 18.8, 15.8; HRMS (ESI) calcd for C<sub>25</sub>H<sub>24</sub>N<sub>2</sub>O<sub>3</sub>SNa [M+Na]<sup>+</sup>: 455.1400, found: 455.1410.

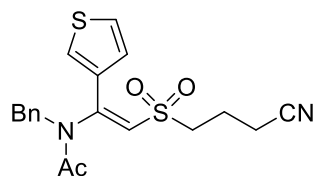

(*E*)-*N*-benzyl-*N*-(2-((3-cyanopropyl)sulfonyl)-1-(thiophen-3-yl)vinyl)acetamide (**3p**)

Purification by flash chromatography (*n*-hexane/ethyl acetate = 1:1) afforded **3p**. Colorless oil; 106.1 mg, 91% yield; <sup>1</sup>H NMR (400 MHz, CDCl<sub>3</sub>) δ 7.81-7.84 (m, 1H), 7.41-7.45 (m, 1H), 7.28-7.38 (m, 3H), 7.21-7.24 (m, 3H), 6.10 (s, 1H), 4.73 (s, 2H), 2.82 (t, *J* = 7.3 Hz, 2H), 2.43 (t, *J* = 7.0 Hz, 2H), 2.10 (s, 3H), 1.89-1.98 (m, 2H); <sup>13</sup>C NMR (100 MHz, CDCl<sub>3</sub>) δ 170.2, 147.3, 136.2, 133.2, 131.5, 128.8, 128.3, 128.0, 127.8, 127.1, 124.9, 117.9, 52.5, 51.2, 23.1, 18.4, 16.0; HRMS (ESI) calcd for C<sub>19</sub>H<sub>20</sub>N<sub>2</sub>O<sub>3</sub>SNa [M+Na]<sup>+</sup>: 411.0808, found: 411.0809.

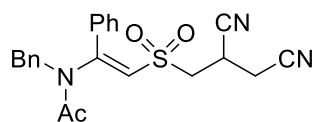

(*E*)-*N*-benzyl-*N*-(2-((2,3-dicyanopropyl)sulfonyl)-1-phenylvinyl)acetamide (**3q**)

Purification by flash chromatography (*n*-hexane/ethyl acetate = 1:1) afforded **3q**. Colorless oil; 38.5 mg, 32% yield; <sup>1</sup>H NMR (400 MHz, CDCl<sub>3</sub>) δ 7.55-7.60 (m, 1H), 7.41-7.51 (m, 4H), 7.29-7.40 (m, 3H), 7.13-7.20 (m, 2H), 6.30 (s, 1H), 4.65-4.76 (m, 2H), 3.32-

3.41 (m, 1H), 2.94-3.08 (m, 2H), 2.75-2.83 (m, 2H), 2.15 (s, 3H);  $^{13}\text{C}$  NMR (100 MHz,  $\text{CDCl}_3$ )  $\delta$  171.2, 154.8, 136.0, 132.0, 131.8, 129.9, 129.0, 128.9, 128.1, 127.6, 122.6, 116.5, 114.7, 53.7, 51.6, 23.9, 23.2, 20.5; HRMS (ESI) calcd for  $\text{C}_{22}\text{H}_{21}\text{N}_3\text{O}_3\text{SNa}$   $[\text{M}+\text{Na}]^+$ : 430.1196, found: 430.1204.

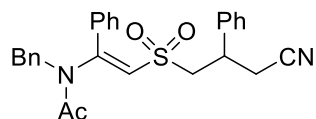

(*E*)-*N*-benzyl-*N*-(2-((3-cyano-2-phenylpropyl)sulfonyl)-1-phenylvinyl)acetamide (**3r**)

Purification by flash chromatography (*n*-hexane/ethyl acetate = 1:1) afforded **3r**. Colorless oil; 119.7 mg, 58% yield;  $^1\text{H}$  NMR (400 MHz,  $\text{CDCl}_3$ )  $\delta$  7.45-7.54 (m, 1H), 7.41 (d,  $J$  = 4.2 Hz, 4H), 7.26-7.35 (m, 6H), 7.05-7.15 (m, 4H), 6.10 (s, 1H), 4.60 (d,  $J$  = 15.4 Hz, 1H), 4.53 (d,  $J$  = 15.4 Hz, 1H), 3.44-3.55 (m, 1H), 3.15-3.25 (m, 1H), 2.99-3.08 (m, 1H), 2.70-2.82 (m, 2H), 2.12 (d,  $J$  = 0.5 Hz, 3H);  $^{13}\text{C}$  NMR (100 MHz,  $\text{CDCl}_3$ )  $\delta$  170.4, 153.0, 139.0, 136.1, 132.0, 131.6, 129.7, 129.1, 128.7, 128.5, 128.3, 127.9, 127.8, 126.9, 124.9, 117.1, 58.3, 50.8, 35.7, 24.0, 23.3; HRMS (ESI) calcd for  $\text{C}_{27}\text{H}_{26}\text{N}_2\text{O}_3\text{SNa}$   $[\text{M}+\text{Na}]^+$ : 481.1556, found: 481.1566.

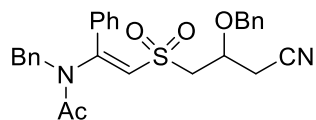

(*E*)-*N*-benzyl-*N*-(2-((2-(benzyloxy)-3-cyanopropyl)sulfonyl)-1-phenylvinyl)acetamide (**3s**)

Purification by flash chromatography (*n*-hexane/ethyl acetate = 1:1) afforded **3s**. Colorless oil; 123.1 mg, 56% yield;  $^1\text{H}$  NMR (400 MHz,  $\text{CDCl}_3$ )  $\delta$  7.49-7.54 (m, 1H), 7.39-7.46 (m, 4H), 7.23-7.36 (m, 8H), 7.06-7.12 (m, 2H), 6.25 (s, 1H), 4.63 (d,  $J$  = 15.2 Hz, 1H), 4.51 (d,  $J$  = 11.2 Hz, 1H), 4.37-4.45 (m, 2H), 4.10-4.18 (m, 1H), 3.18-3.26 (m, 1H), 2.92-2.99 (m, 1H), 2.63-2.71 (m, 1H), 2.44-2.53 (m, 1H), 2.08 (s, 3H);  $^{13}\text{C}$  NMR (100 MHz,  $\text{CDCl}_3$ )  $\delta$  170.3, 152.6, 136.2, 136.0, 132.2, 131.5, 129.4, 128.6, 128.6, 128.5, 128.1, 128.0, 127.7, 125.7, 115.9, 72.4, 69.3, 58.6, 50.6, 23.2, 22.8; HRMS (ESI) calcd for  $\text{C}_{28}\text{H}_{28}\text{N}_2\text{O}_4\text{SNa}$   $[\text{M}+\text{Na}]^+$ : 511.1662, found: 511.1663.

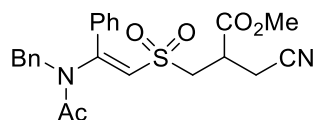

Methyl (*E*)-3-((2-(*N*-benzylacetamido)-2-phenylvinyl)sulfonyl)-2-(cyanomethyl)prop-anoate (**3t**)

Purification by flash chromatography (*n*-hexane/ethyl acetate = 1:1) afforded **3t**. Colorless oil; 69.4 mg, 35% yield; <sup>1</sup>H NMR (400 MHz, CDCl<sub>3</sub>) δ 7.51-7.58 (m, 1H), 7.43-7.50 (m, 4H), 7.28-7.37 (m, 3H), 7.14-7.18 (m, 2H), 6.26 (s, 1H), 4.59-4.70 (m, 2H), 3.72 (d, *J* = 0.8 Hz, 3H), 3.36 (dd, *J* = 14.2, 4.1 Hz, 1H), 3.14-3.22 (m, 1H), 2.97-3.05 (m, 1H), 2.75-2.87 (m, 2H), 2.19 (s, 3H); <sup>13</sup>C NMR (100 MHz, CDCl<sub>3</sub>) δ 170.6, 169.7, 153.8, 136.1, 131.9, 131.7, 129.8, 128.8, 128.6, 127.9, 127.9, 124.4, 116.4, 54.1, 53.2, 50.9, 35.8, 23.4, 19.0; HRMS (ESI) calcd for C<sub>23</sub>H<sub>24</sub>N<sub>2</sub>O<sub>5</sub>SNa [M+Na]<sup>+</sup>: 463.1298, found: 463.1303.

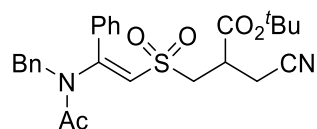

*tert*-butyl (*E*)-3-((2-(*N*-benzylacetamido)-2-phenylvinyl)sulfonyl)-2-(cyanomethyl)prop-anoate (**3u**)

Purification by flash chromatography (*n*-hexane/ethyl acetate = 1:1) afforded **3u**. Colorless oil; 65.2 mg, 52% yield; <sup>1</sup>H NMR (400 MHz, CDCl<sub>3</sub>) δ 7.50-7.57 (m, 1H), 7.43-7.50 (m, 4H), 7.27-7.37 (m, 3H), 7.14-7.19 (m, 2H), 6.23 (s, 1H), 4.64 (s, 2H), 3.33 (dd, *J* = 14.1, 3.8 Hz, 1H), 3.02-3.10 (m, 1H), 2.91-2.99 (m, 1H), 2.71-2.83 (m, 2H), 2.20 (s, 3H), 1.44 (s, 9H); <sup>13</sup>C NMR (100 MHz, CDCl<sub>3</sub>) δ 170.5, 168.2, 153.8, 136.3, 132.1, 131.8, 129.9, 128.9, 128.8, 128.1, 128.0, 124.9, 116.6, 83.8, 54.3, 51.0, 36.7, 27.8, 23.5, 19.4; HRMS (ESI) calcd for C<sub>26</sub>H<sub>30</sub>N<sub>2</sub>O<sub>5</sub>SNa [M+Na]<sup>+</sup>: 505.1768, found: 505.1772.

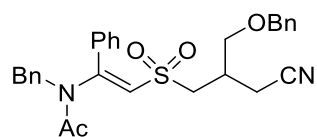

(*E*)-*N*-benzyl-*N*-(2-((3-(benzyloxy)-2-(cyanomethyl)propyl)sulfonyl)-1-phenylvinyl)acetamide (**3v**)

Purification by flash chromatography (*n*-hexane/ethyl acetate = 1:1) afforded **3v**. Colorless oil; 67.9 mg, 45% yield; <sup>1</sup>H NMR (400 MHz, CDCl<sub>3</sub>) δ 7.46-7.53 (m, 1H), 7.41-7.45 (m, 4H), 7.28-7.36 (m, 6H), 7.23-7.26 (m, 2H), 7.12-7.17 (m, 2H), 6.18 (s, 1H), 4.61 (s, 2H), 4.44 (s, 2H), 3.38-3.47 (m, 2H), 2.96 (dd, *J* = 14.6, 5.2 Hz, 1H), 2.74-2.81 (m, 1H),

2.45-2.66 (m, 3H), 2.17 (s, 3H);  $^{13}\text{C}$  NMR (100 MHz,  $\text{CDCl}_3$ )  $\delta$  170.4, 153.1, 137.2, 136.2, 132.0, 131.7, 129.7, 128.8, 128.6, 128.4, 128.1, 128.0, 127.9, 127.7, 125.3, 117.2, 73.3, 69.8, 55.0, 50.8, 30.9, 23.4, 19.0; HRMS (ESI) calcd for  $\text{C}_{29}\text{H}_{30}\text{N}_2\text{O}_4\text{SNa}$   $[\text{M}+\text{Na}]^+$ : 525.1818, found: 525.1823.

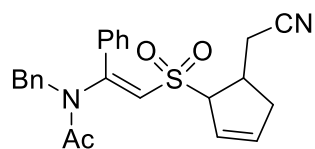

(*E*)-*N*-benzyl-*N*-(2-((5-(cyanomethyl)cyclopent-2-en-1-yl)sulfonyl)-1-phenylvinyl)acetamide (**3w**)

Purification by flash chromatography (*n*-hexane/ethyl acetate = 1:1) afforded **3w**. Colorless oil; 56.8 mg, 46% yield;  $^1\text{H}$  NMR (400 MHz,  $\text{CDCl}_3$ )  $\delta$  7.51-7.57 (m, 1H), 7.45-7.50 (m, 4H), 7.27-7.37 (m, 3H), 7.14-7.18 (m, 2H), 6.18 (s, 1H), 5.73-5.78 (m, 1H), 5.52-5.58 (m, 1H), 4.62 (s, 2H), 3.43-3.50 (m, 1H), 3.14-3.22 (m, 1H), 2.55-2.70 (m, 3H), 2.39-2.48 (m, 1H), 2.20 (s, 3H);  $^{13}\text{C}$  NMR (100 MHz,  $\text{CDCl}_3$ )  $\delta$  170.3, 153.3, 136.2, 132.1, 131.6, 130.8, 129.6, 129.6, 128.8, 128.5, 127.9, 123.6, 117.0, 65.3, 50.8, 42.5, 34.4, 23.2, 23.0; HRMS (ESI) calcd for  $\text{C}_{24}\text{H}_{24}\text{N}_2\text{O}_3\text{SNa}$   $[\text{M}+\text{Na}]^+$ : 443.1400, found: 443.1402.

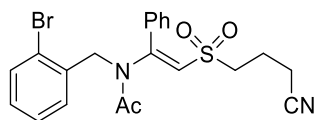

(*E*)-*N*-(2-bromobenzyl)-*N*-(2-((3-cyanopropyl)sulfonyl)-1-phenylvinyl)acetamide (**3x**)

Purification by flash chromatography (*n*-hexane/ethyl acetate = 1:1) afforded **3x**. Colorless oil; 161.9 mg, 78% yield;  $^1\text{H}$  NMR (400 MHz,  $\text{CDCl}_3$ )  $\delta$  7.50-7.58 (m, 2H), 7.40-7.49 (m, 4H), 7.29-7.35 (m, 1H), 7.11-7.22 (m, 2H), 6.35 (s, 1H), 4.80 (s, 2H), 2.86 (t,  $J$  = 7.3 Hz, 2H), 2.45 (t,  $J$  = 7.0 Hz, 2H), 2.19 (s, 3H), 1.97-2.07 (m, 2H);  $^{13}\text{C}$  NMR (100 MHz,  $\text{CDCl}_3$ )  $\delta$  170.8, 153.1, 135.0, 133.2, 132.0, 131.8, 129.8, 129.6, 129.5, 128.7, 127.9, 124.7, 123.2, 118.0, 53.1, 51.5, 23.5, 18.5, 16.1; HRMS (ESI) calcd for  $\text{C}_{21}\text{H}_{21}\text{BrN}_2\text{O}_3\text{SNa}$   $[\text{M}+\text{Na}]^+$ : 483.0348, found: 483.0361.

(E)-N-benzyl-N-(2-((3-cyanopropyl)sulfonyl)-1-phenylvinyl)acetamide (**3a**)

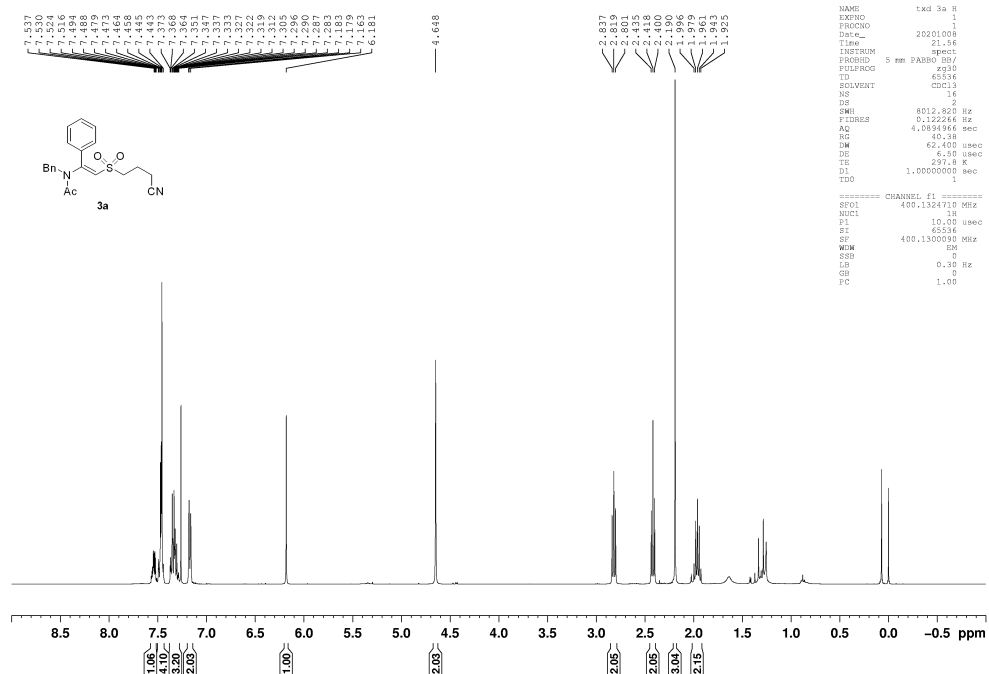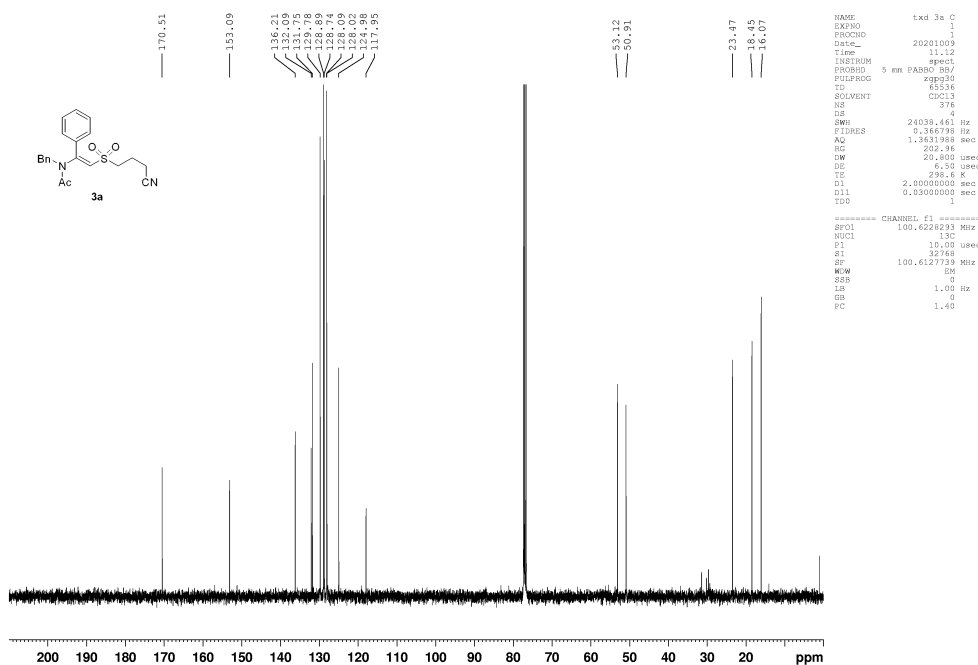

(E)-N-benzyl-N-(2-((3-cyanopropyl)sulfonyl)-1-(p-tolyl)vinyl)acetamide (**3b**)

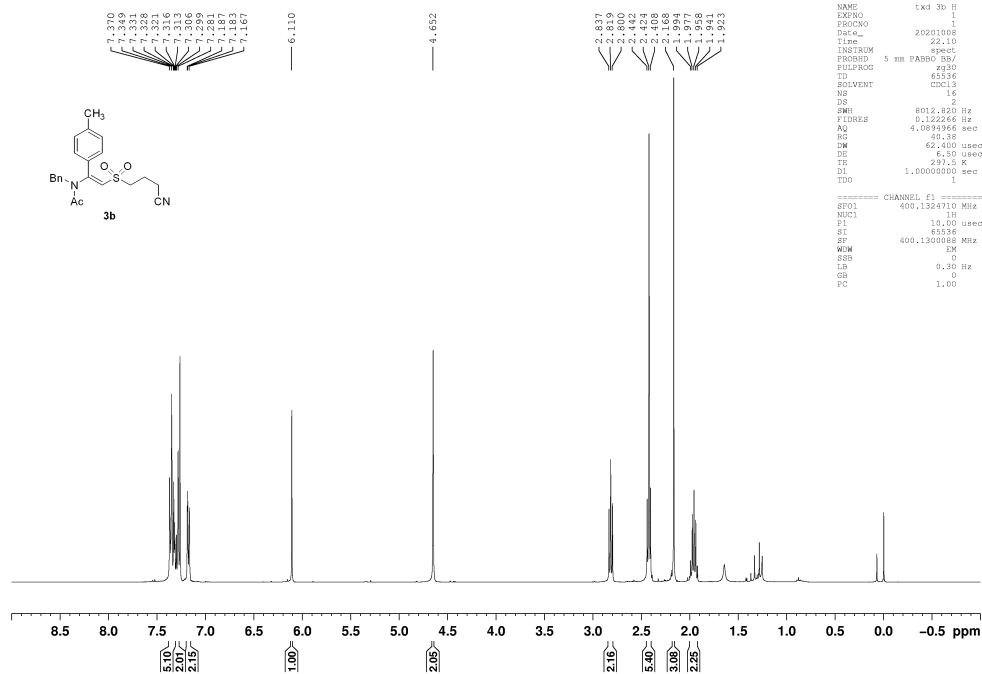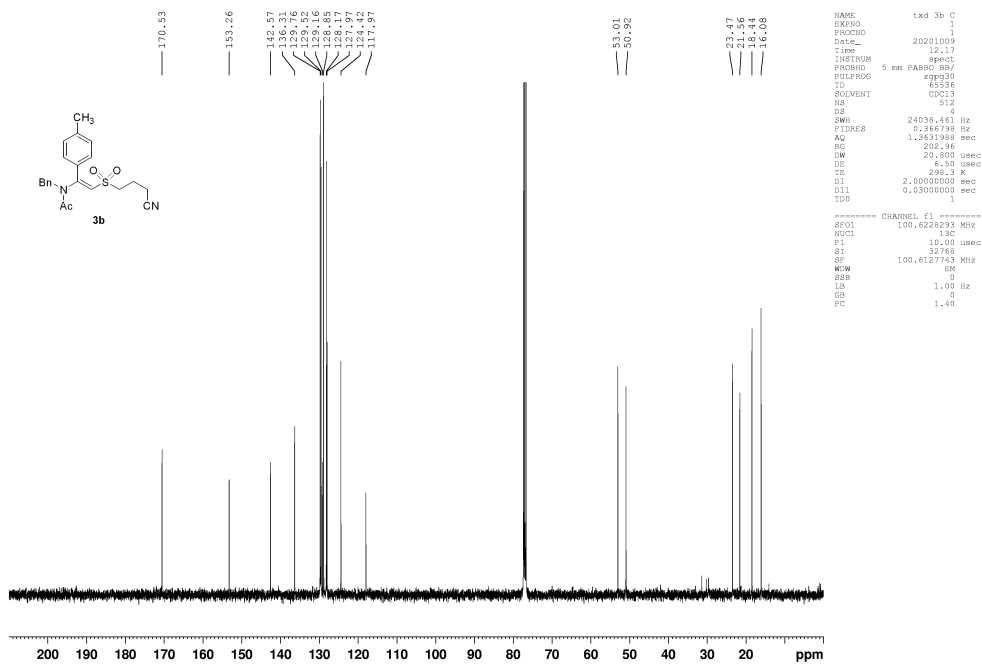

(E)-N-benzyl-N-(2-((3-cyanopropyl)sulfonyl)-1-(o-tolyl)vinyl)acetamide (**3c**)

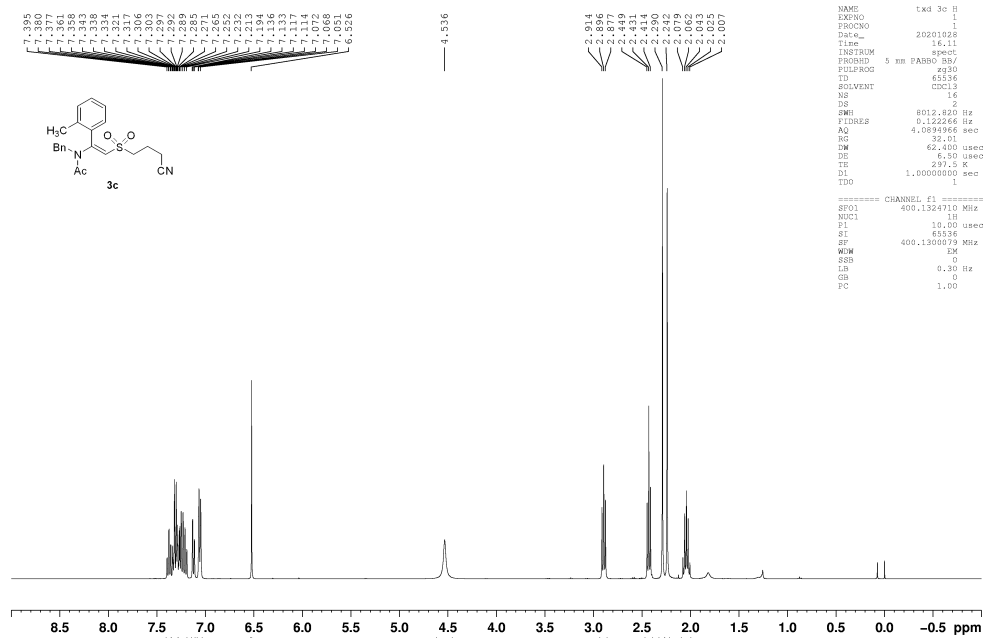

```

NAME      txd 3c H
EXPNO    1
PROCNO   1
PROCRES  20201028
DATE_    16.11
INSTRUM  spect
PROBHD   5 mm PABBO 80
PULPROG  zg30
TD        65536
SOLVENT  CDCl3
NS        16
DS        4
SWH       8012.826 Hz
FIDRES   0.122266 Hz
AQ        4.0893966 sec
RG         32.01
DW        62.400 usec
DE        6.30 usec
TE        297.5 K
D1        1.00000000 sec
TDO       1

===== CHANNEL f1 =====
SFO1     400.1324710 MHz
NUC1      1H
P1        10.00 usec
SI        65536
SF        400.1300079 MHz
WDW       EM
SSB       0
LB        0.30 Hz
GB        0
PC        1.00
    
```

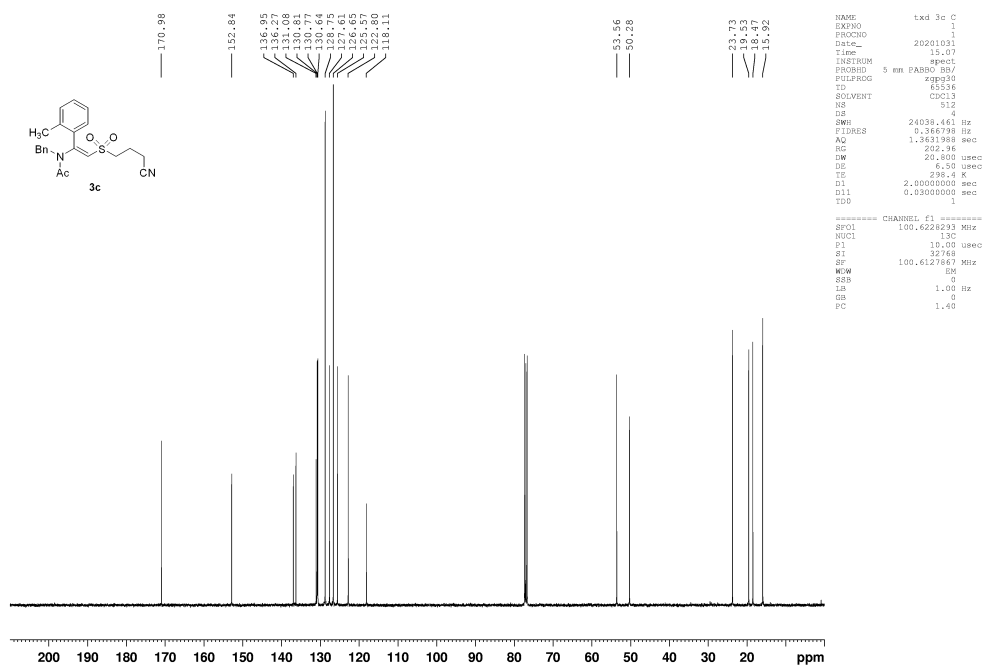

```

NAME      txd 3c C
EXPNO    1
PROCNO   1
PROCRES  20201031
DATE_    15.07
INSTRUM  spect
PROBHD   5 mm PABBO 80
PULPROG  zgpg30
TD        65536
SOLVENT  CDCl3
NS        4
DS        4
SWH       24038.461 Hz
FIDRES   0.1364798 Hz
AQ        1.3631988 sec
RG         202.96
DW        20.800 usec
DE        6.30 usec
TE        295.4 K
D1        2.80000000 sec
D11       0.32000000 sec
TDO       1

===== CHANNEL f1 =====
SFO1     100.6228293 MHz
NUC1      13C
P1        10.00 usec
SI        32768
SF        100.6127669 MHz
WDW       EM
SSB       0
LB        1.00 Hz
GB        0
PC        1.00
    
```



(E)-N-benzyl-N-(2-((3-cyanopropyl)sulfonyl)-1-(4-methoxyphenyl)vinyl)acetamide (**3d**)

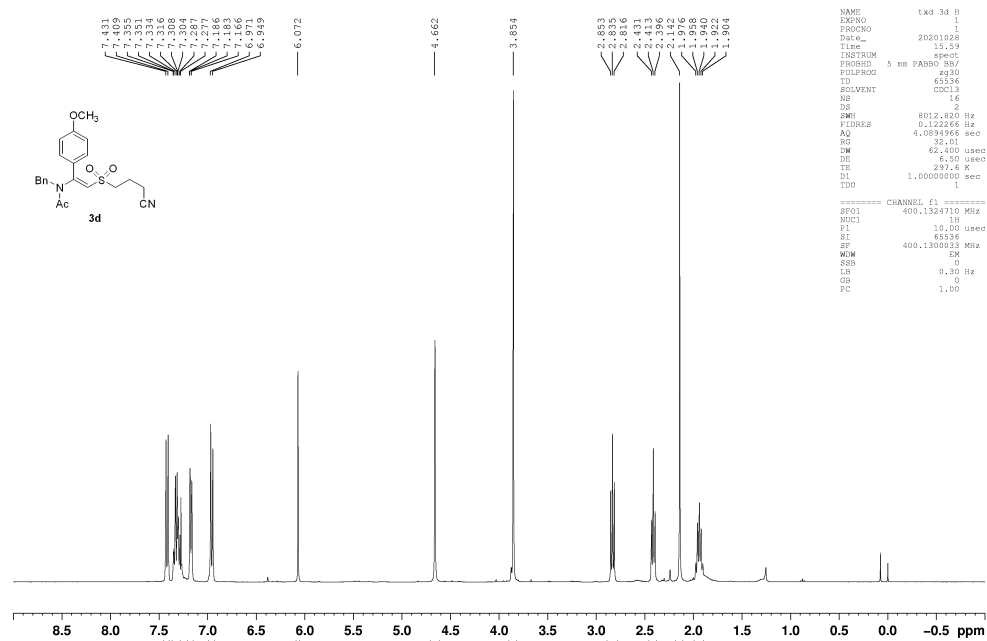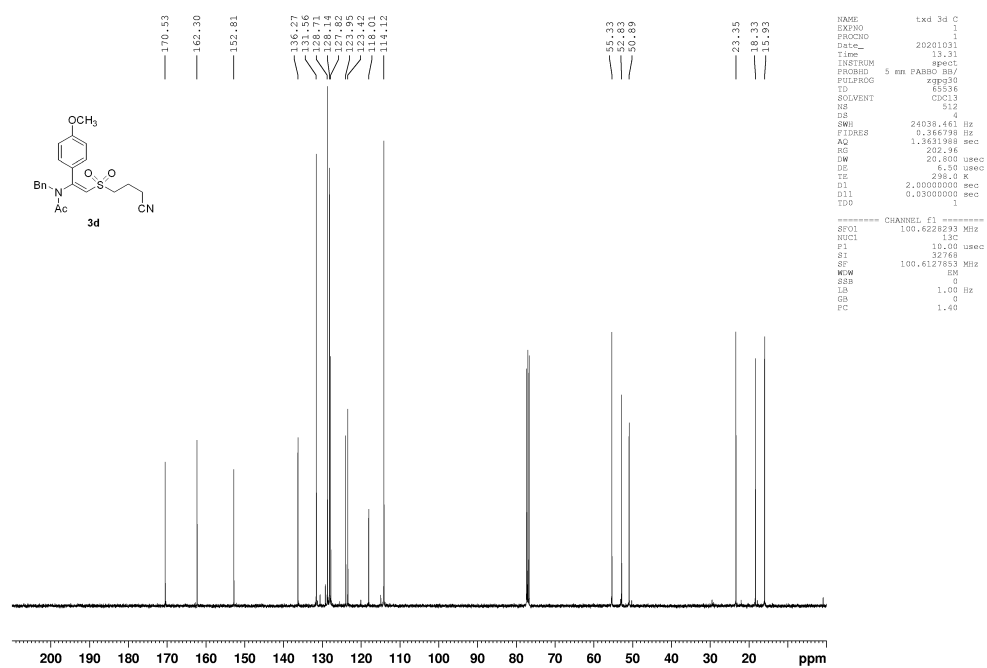

(E)-N-(1-([1,1'-biphenyl]-4-yl)-2-((3-cyanopropyl)sulfonyl)vinyl)-N-benzylacetamide  
**(3e)**

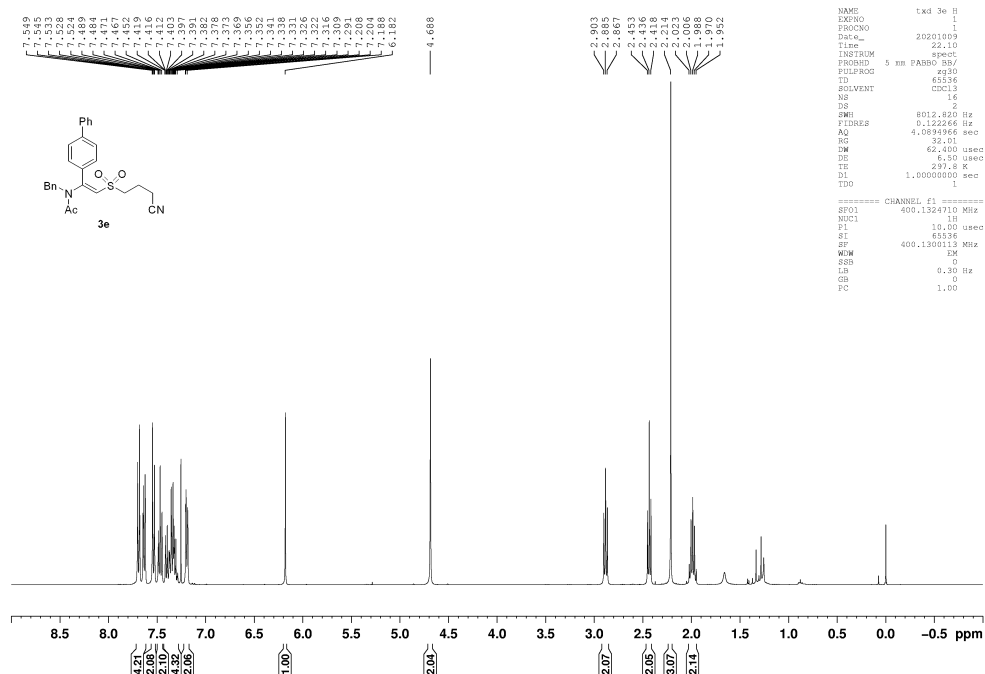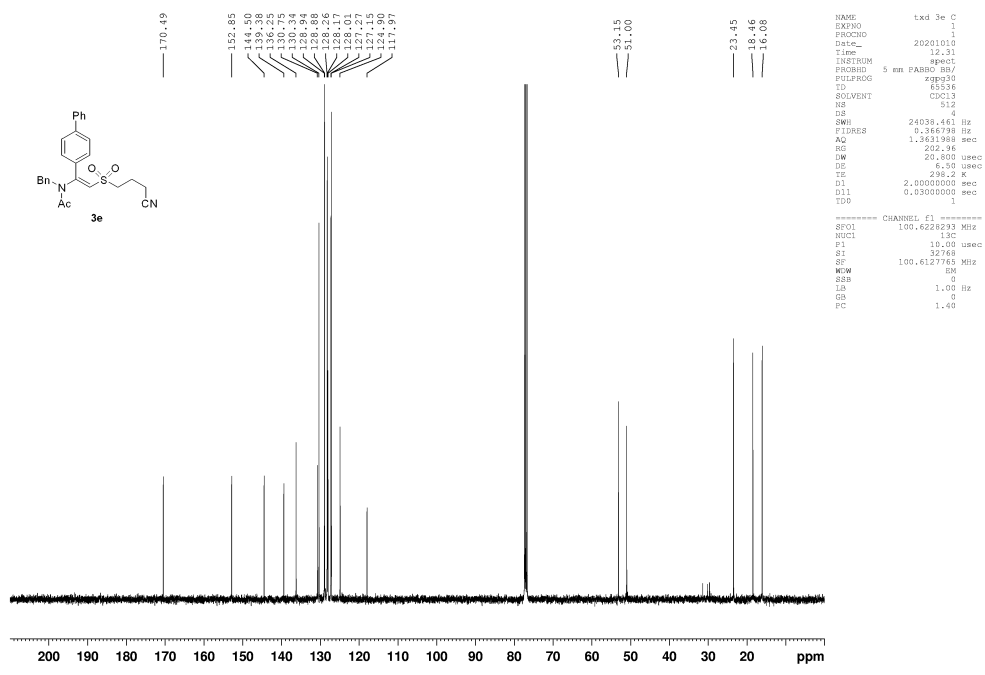

(E)-N-benzyl-N-(1-(4-(benzyloxy)phenyl)-2-((3-cyanopropyl)sulfonyl)vinyl)acetamide  
**(3f)**

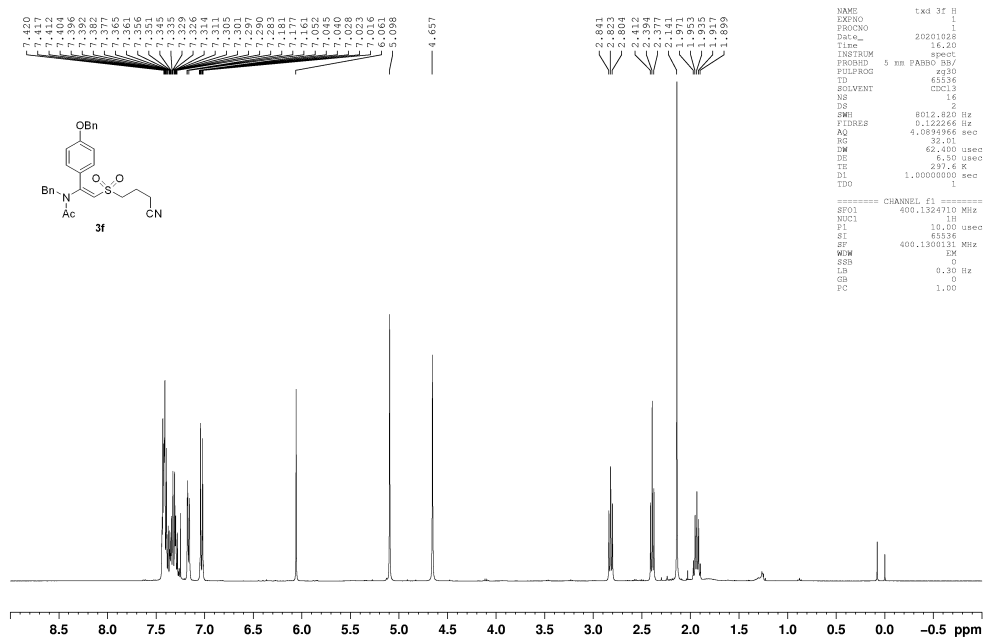

```

NAME      txd 3f H
EXPNO     1
PROCNO    2
Date_     20210328
Time      16.20
INSTRUM   spect
PROBHD    5 mm PABBO BB7
PULPROG   zgpg30
TD        65536
SOLVENT   CDCl3
NS        16
DS        4
SWH        8012.826 Hz
FIDRES    0.122266 Hz
AQ        4.0893966 sec
RG        32.01
DM        62.400 usec
DE        6.50 usec
TE        297.4 K
D1        1.00000000 sec
TD0       1
===== CHANNEL f1 =====
SFO1      400.1324710 MHz
NUC1      1H
P1        10.00 usec
SI        65536
SF        400.1300120 MHz
WDM       EM
SFO2      0
LB        0.30 Hz
GB        0
PC        1.00
    
```

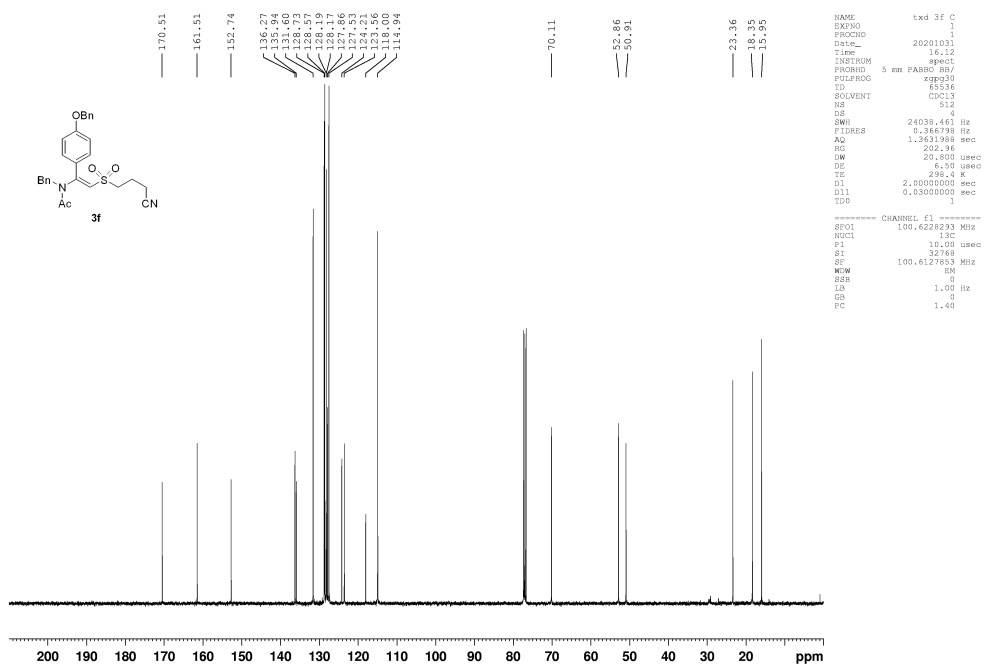

```

NAME      txd 3f C
EXPNO     1
PROCNO    1
Date_     2021031
Time      16.12
INSTRUM   spect
PROBHD    5 mm PABBO BB7
PULPROG   zgpg30
TD        65536
SOLVENT   CDCl3
NS        16
DS        4
SWH        24038.461 Hz
FIDRES    0.386798 Hz
AQ        1.3631988 sec
RG        202.96
DM        23.800 usec
DE        6.50 usec
TE        298.4 K
D1        2.00000000 sec
D11       0.03000000 sec
TD0       1
===== CHANNEL f1 =====
SFO1      100.6228293 MHz
NUC1      13C
P1        10.00 usec
SI        32768
SF        100.6127653 MHz
WDM       EM
SFO2      0
LB        1.00 Hz
GB        0
PC        1.40
    
```

(E)-N-benzyl-N-(1-(4-cyanophenyl)-2-((3-cyanopropyl)sulfonyl)vinyl)acetamide (**3g**)

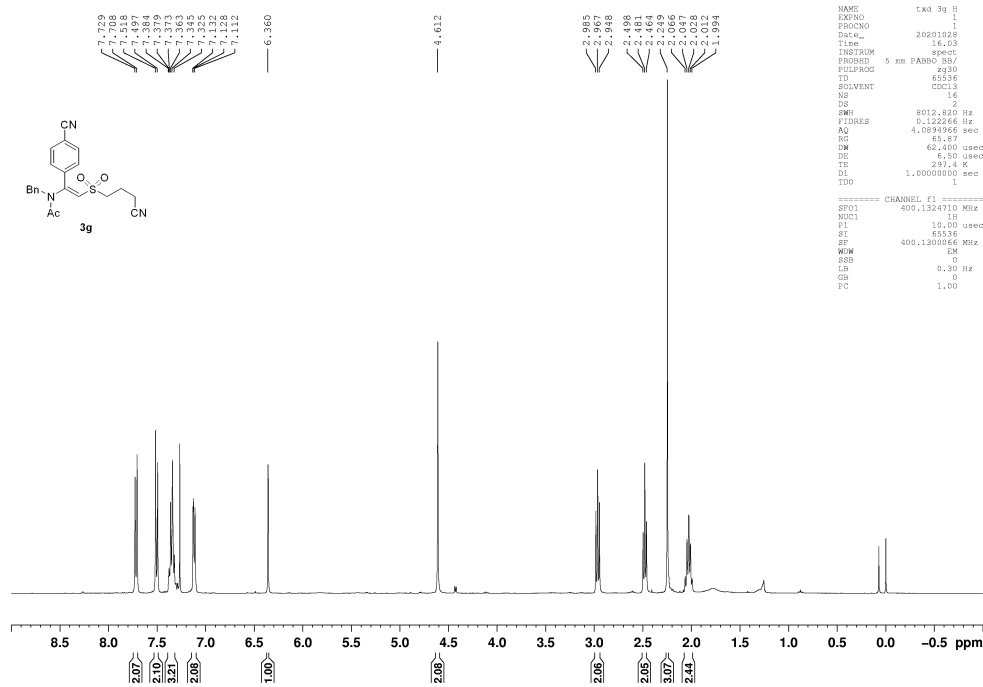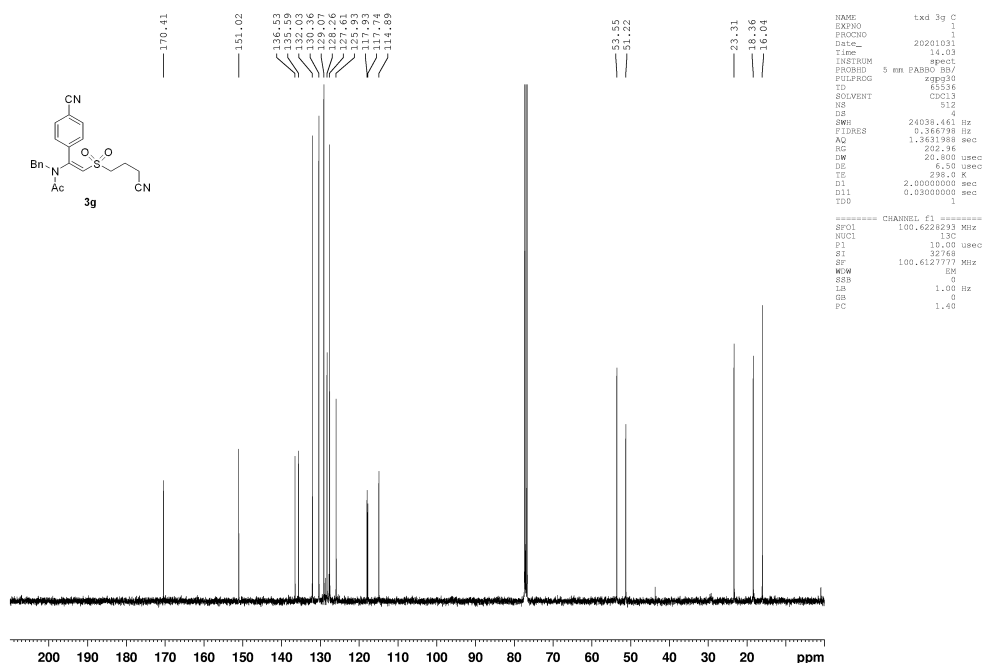

(E)-N-benzyl-N-(2-((3-cyanopropyl)sulfonyl)-1-(4-(trifluoromethyl)phenyl)vinyl)acetamide (**3h**)

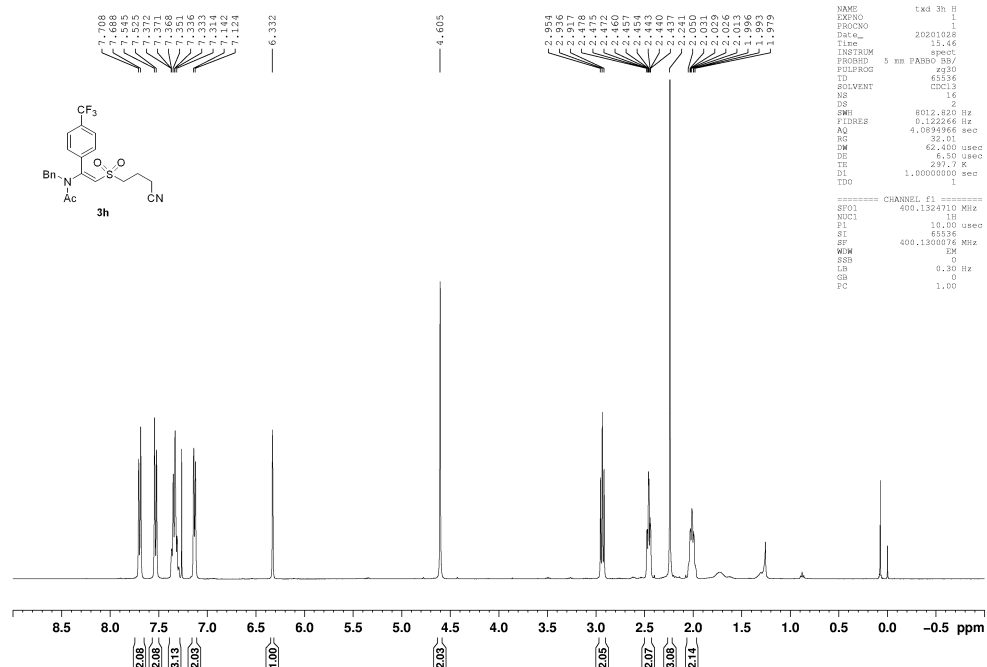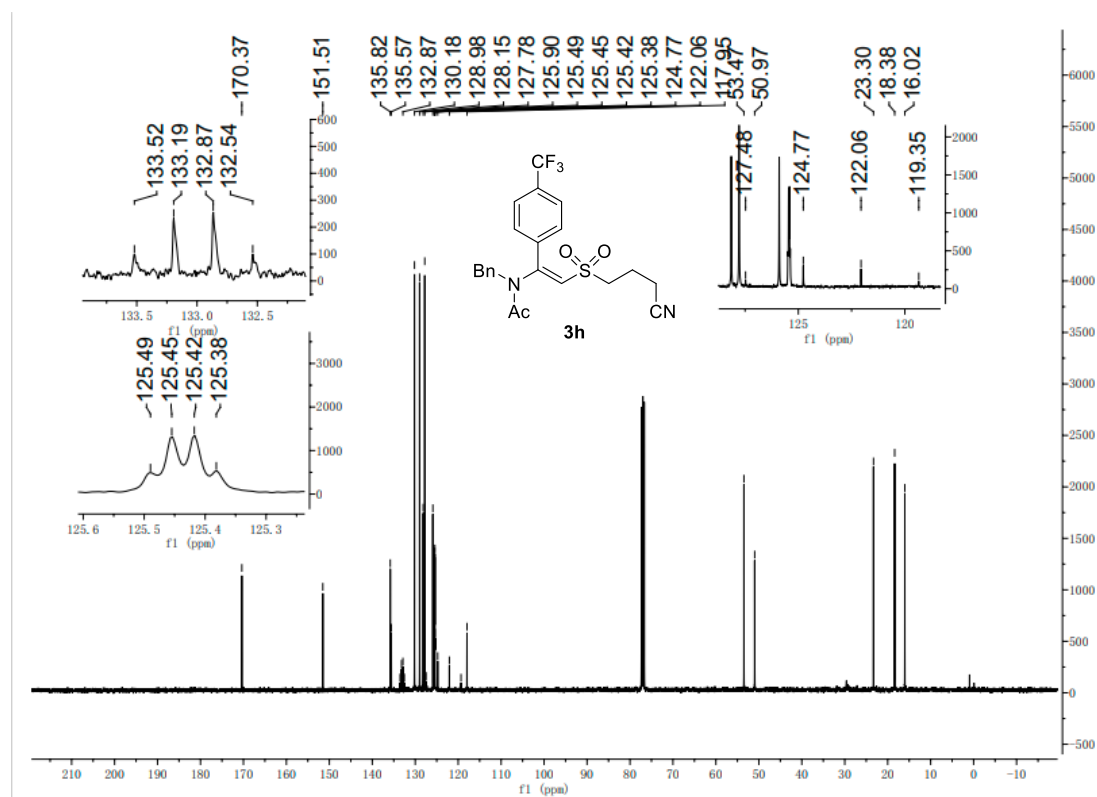

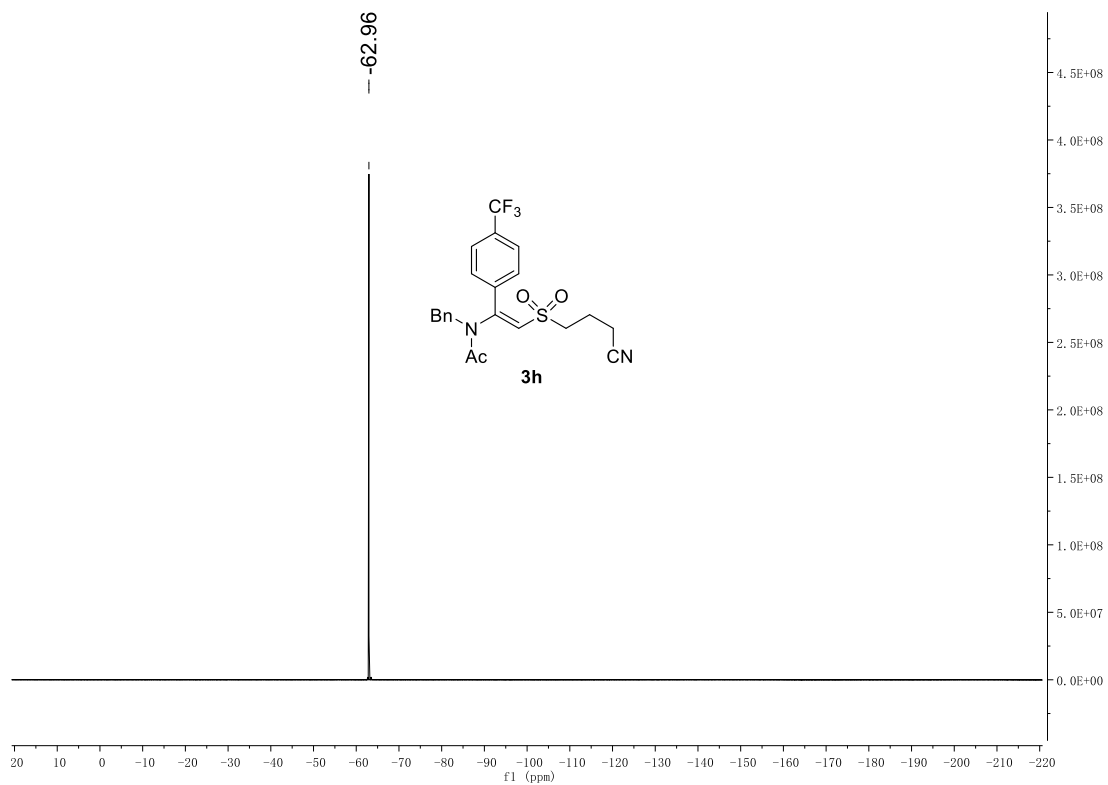

(E)-N-benzyl-N-(2-((3-cyanopropyl)sulfonyl)-1-(4-fluorophenyl)vinyl)acetamide (**3i**)

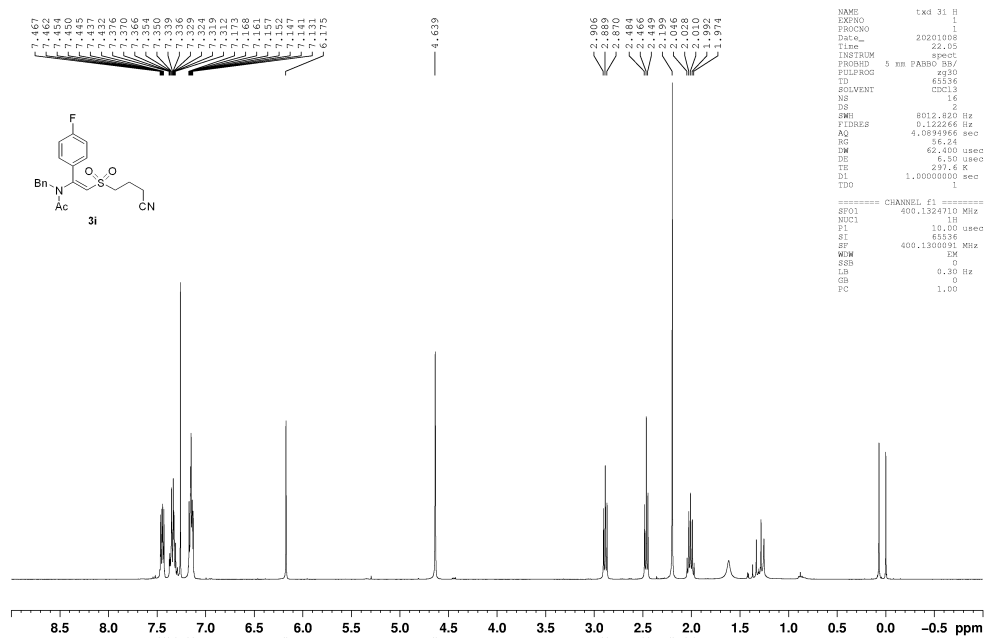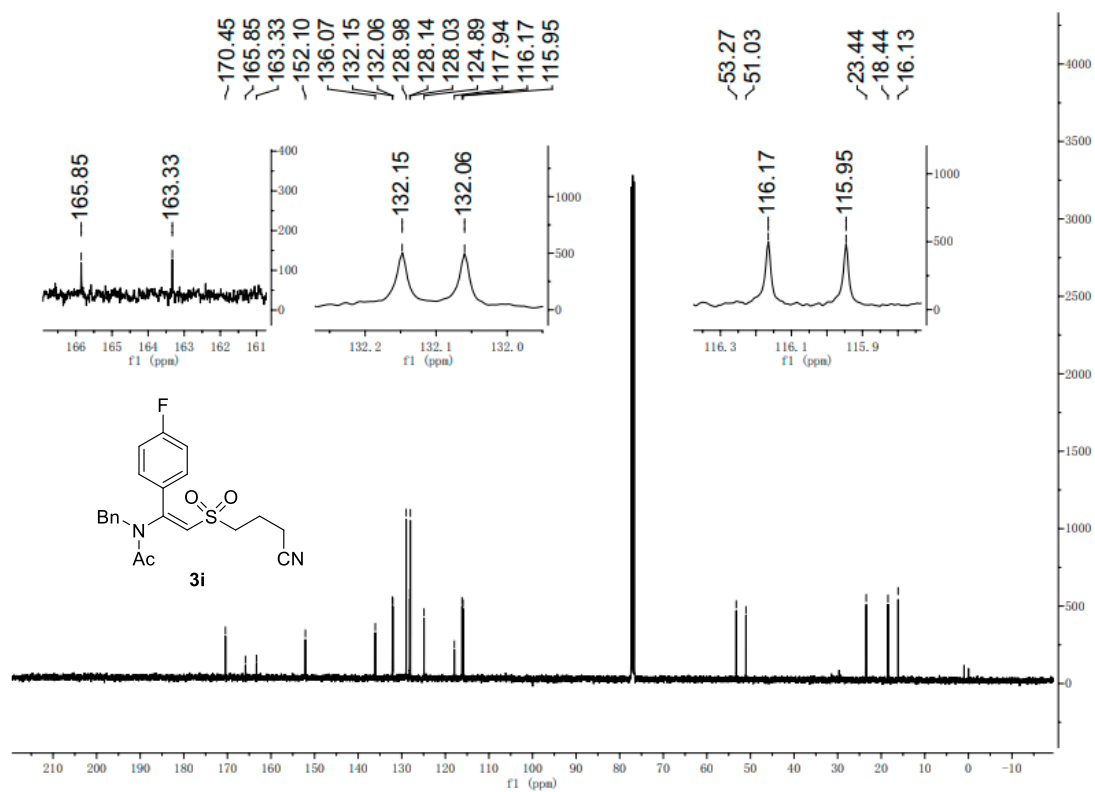

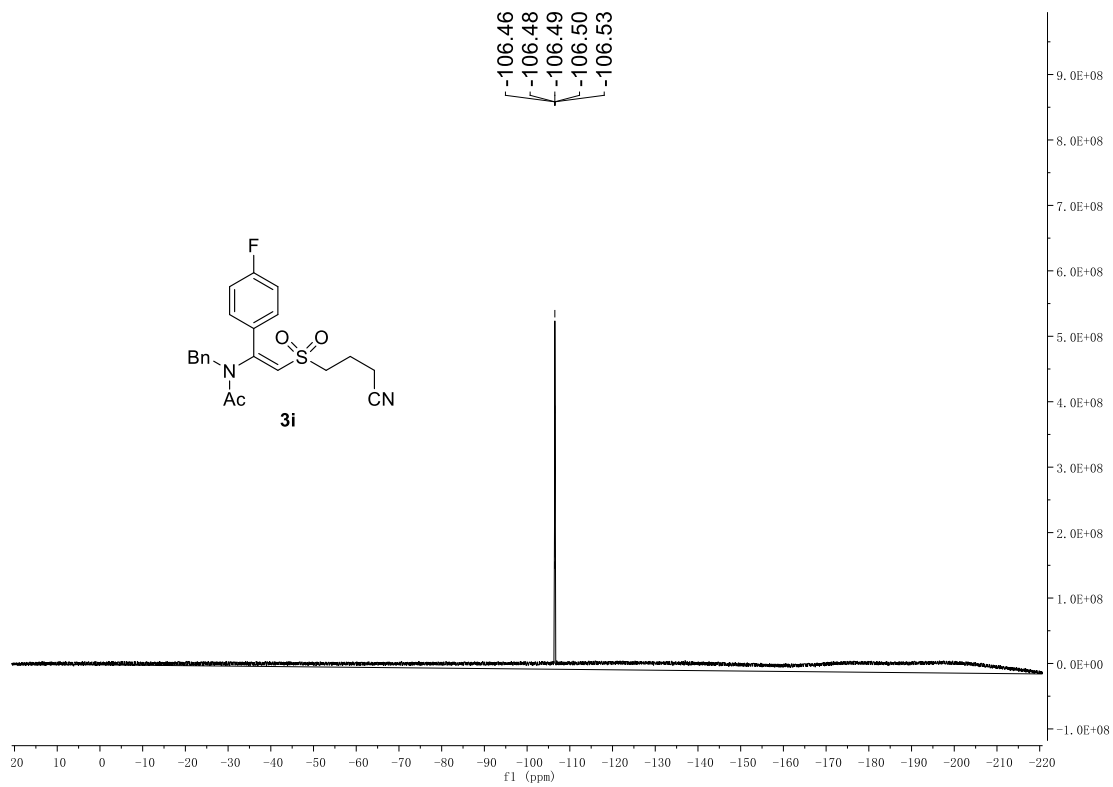



(E)-N-benzyl-N-(1-(2-chlorophenyl)-2-((3-cyanopropyl)sulfonyl)vinyl)acetamide (**3j**)

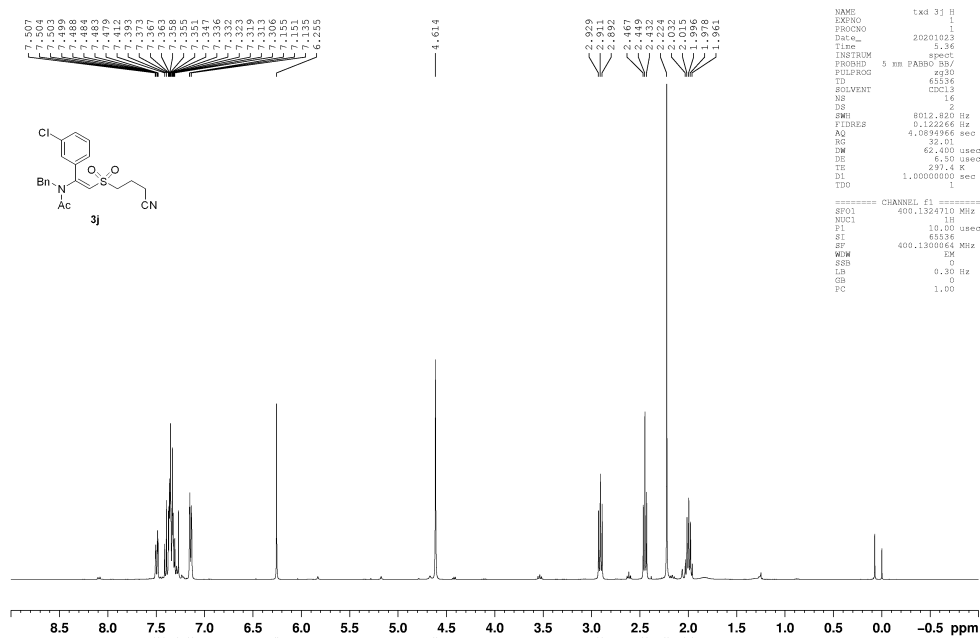

```

NAME      txd 3j H
EXPNO    1
PROCNO   1
Date_    20201023
Time     5.36
INSTRUM  spect
PROBHD   5 mm PABBO 30
PULPROG  zgpg30
TD        65536
SOLVENT  CDCl3
NS        16
DS        4
SWH       8012.826 Hz
FIDRES   0.122266 Hz
AQ        4.0839968 sec
RG         32.01
WC        62.400 usec
DE        6.30 usec
TE        297.4 K
D1        1.00000000 sec
TDO       1

===== CHANNEL f1 =====
SFO1     400.1324710 MHz
NUC1      1H
P1        10.00 usec
SI        65036
SF        400.1300665 MHz
WDW       EM
SSB       0
LB        0.30 Hz
GB        0
PC        1.00
    
```

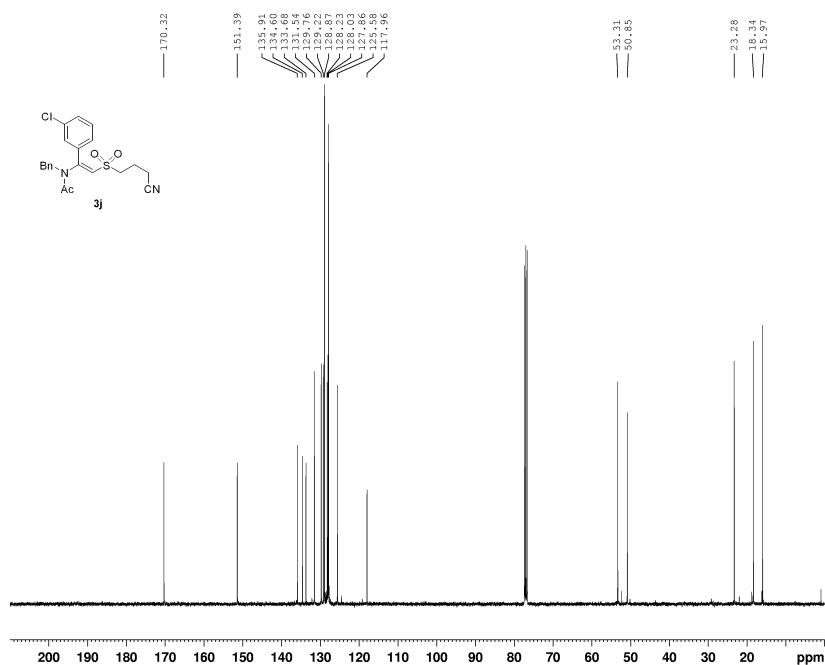

```

NAME      txd 3j C
EXPNO    1
PROCNO   1
Date_    20201023
Time     0.09
INSTRUM  spect
PROBHD   5 mm PABBO 30
PULPROG  zgpg30
TD        65536
SOLVENT  CDCl3
NS        4
DS        4
SWH       24038.461 Hz
FIDRES   1.364798 Hz
AQ        1.3631988 sec
RG         202.96
WC        20.800 usec
DE        6.30 usec
TE        296.3 K
D1        2.80000000 sec
D11       0.33000000 sec
TDO       1

===== CHANNEL f1 =====
SFO1     100.6228243 MHz
NUC1      13C
P1        10.00 usec
SI        32768
SF        100.6127623 MHz
WDW       EM
SSB       0
LB        1.00 Hz
GB        0
PC        1.00
    
```

(E)-N-benzyl-N-(1-(2-bromophenyl)-2-((3-cyanopropyl)sulfonyl)vinyl)acetamide (**3k**)

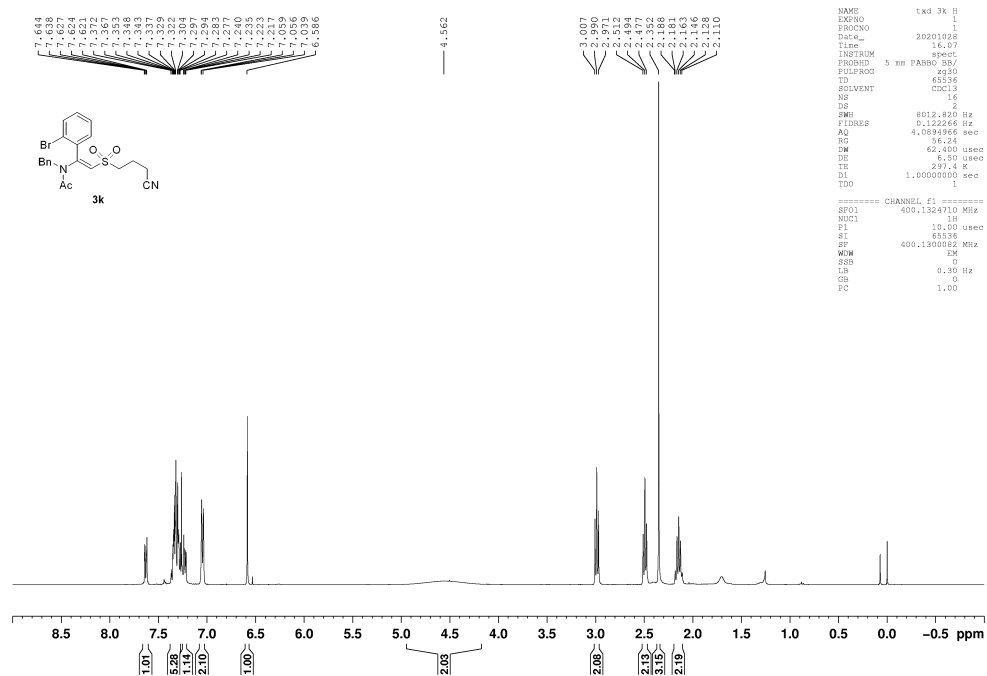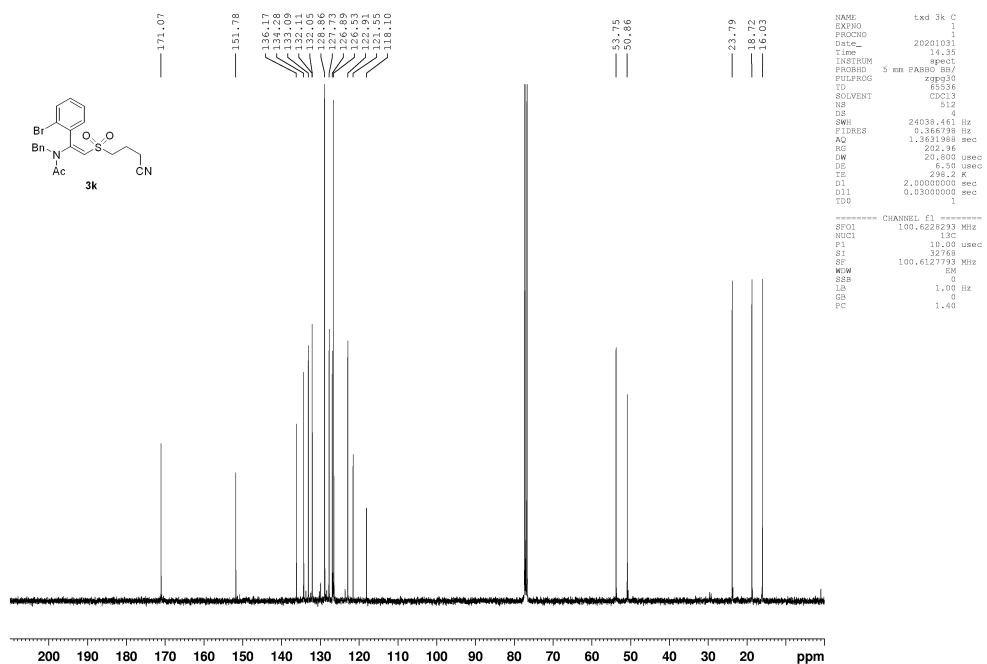

(E)-N-benzyl-N-(2-((3-cyanopropyl)sulfonyl)-1-(4-iodophenyl)vinyl)acetamide (**3I**)

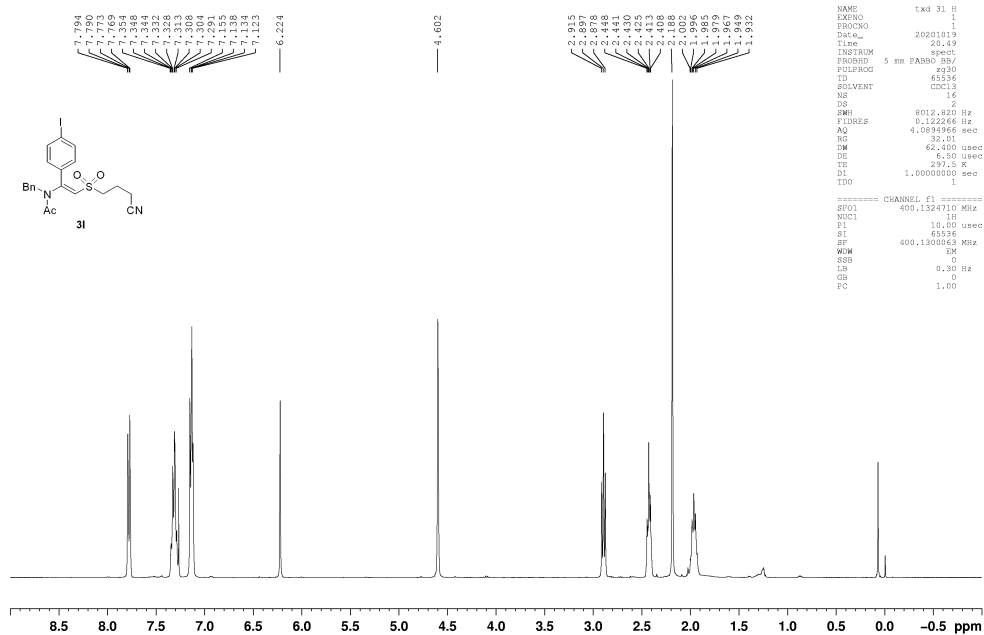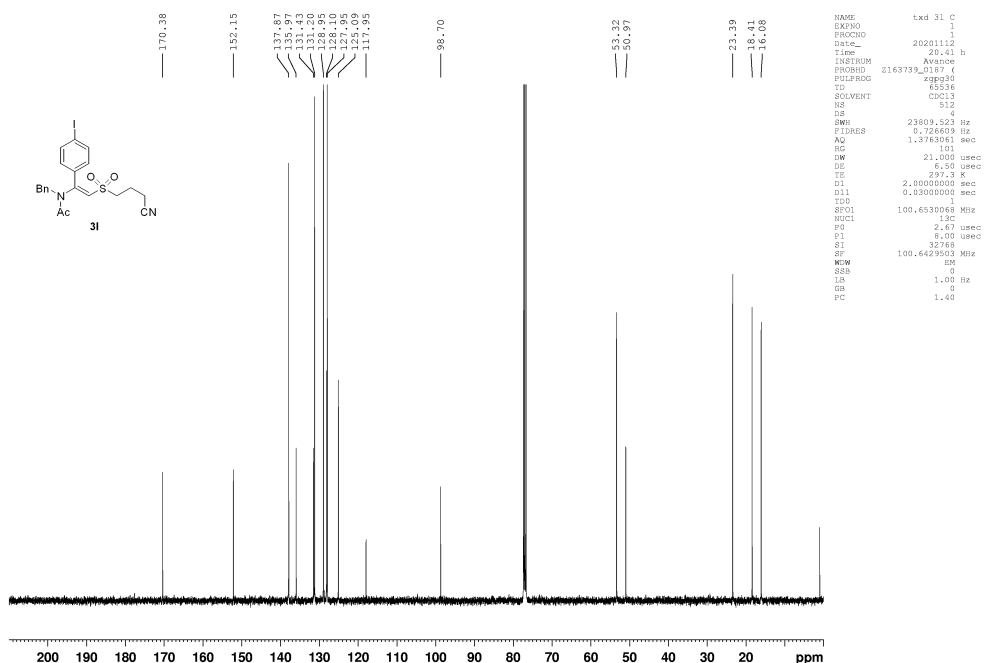

# Methyl (E)-4-(1-(N-benzylacetamido)-2-((3-cyanopropyl)sulfonyl)vinyl)benzoate (3m)

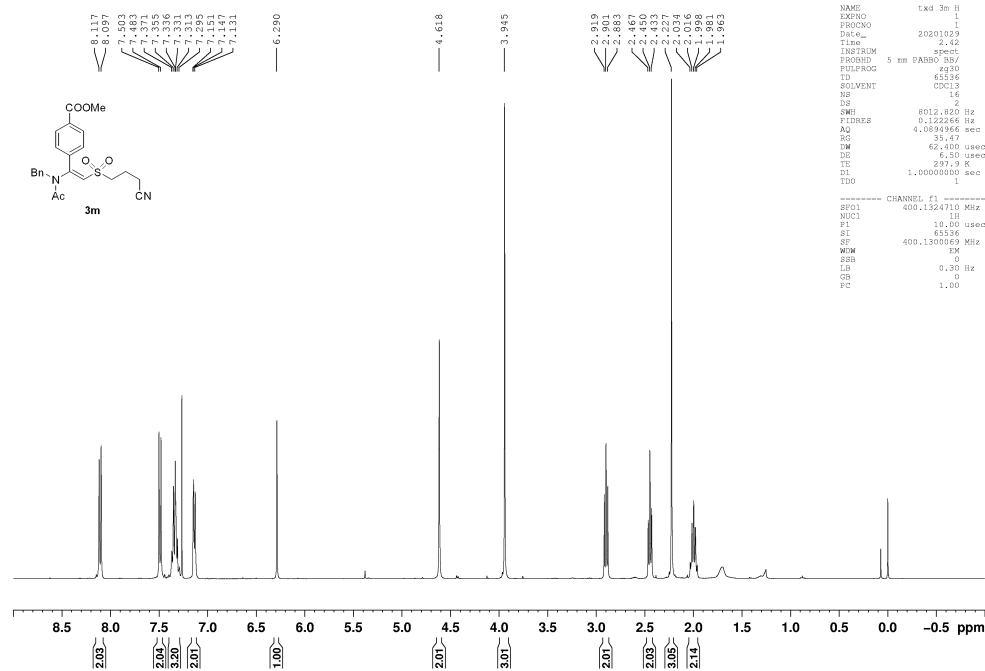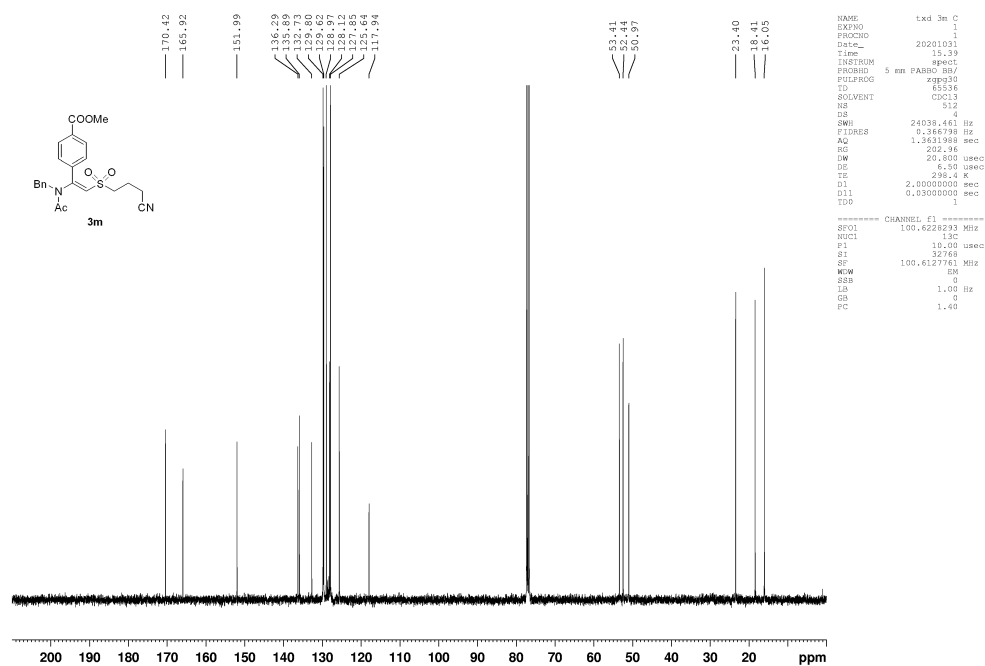

(E)-N-benzyl-N-(2-((3-cyanopropyl)sulfonyl)-1-(naphthalen-2-yl)vinyl)acetamide (**3n**)

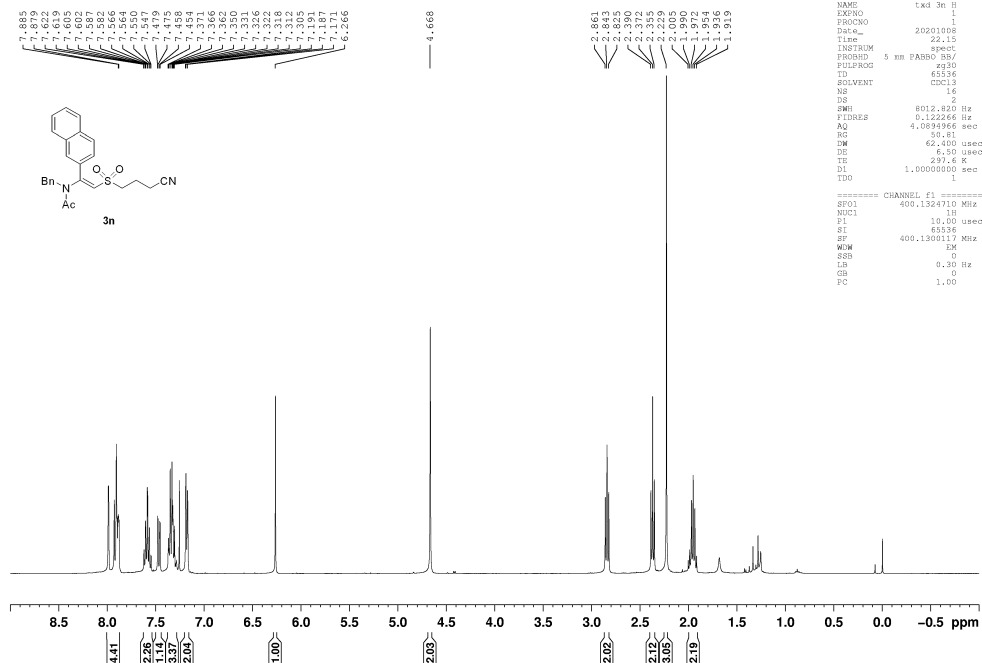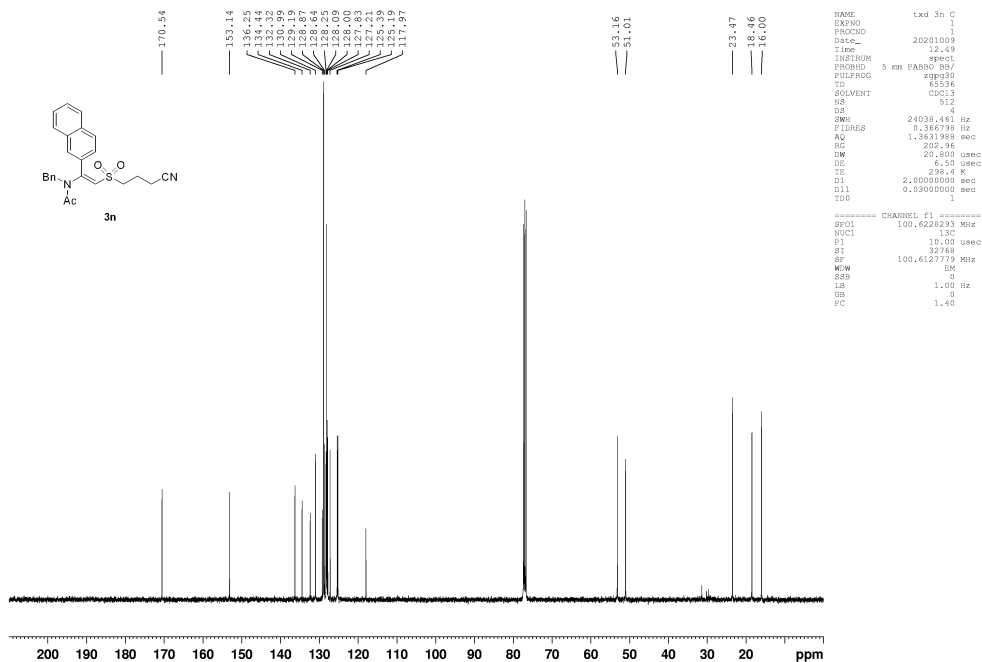

(E)-N-benzyl-N-(2-((3-cyanopropyl)sulfonyl)-1-(naphthalen-1-yl)vinyl)acetamide (**3o**)

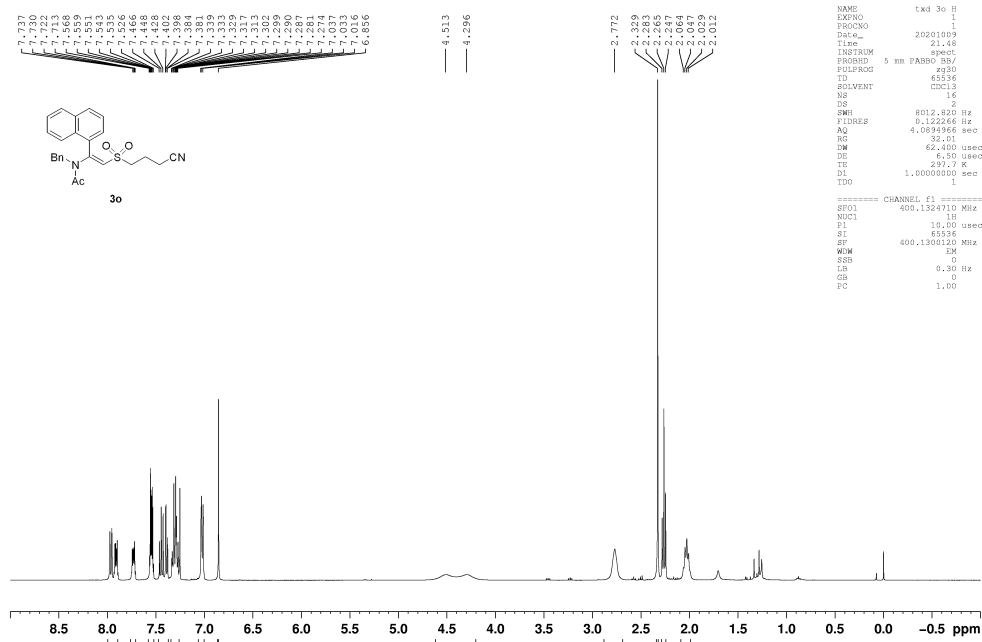

NAME txd 3o H  
 EXPNO 1  
 PROCNO 1  
 Date\_ 20210109  
 Time 21.48  
 INSTRUM spect  
 FREQHU 5 nm PABBO 807  
 PULPROG zg30  
 TD 65336  
 SOLVENT CDCl3  
 NS 16  
 DS 2  
 SWH 8012.825 Hz  
 FIDRES 0.122266 Hz  
 AQ 4.083965 sec  
 RG 32.01  
 DW 62.400 usec  
 DE 6.30 usec  
 TR 297.7 K  
 D1 1.00000000 sec  
 TDO 1  
 ===== CHANNEL f1 =====  
 SFO1 400.1324710 MHz  
 NUC1 1H  
 P1 10.00 usec  
 SI 65336  
 SF 400.1300120 MHz  
 WDW EM  
 SSB 0  
 LB 0.30 Hz  
 GB 0  
 PC 1.00

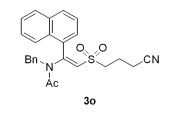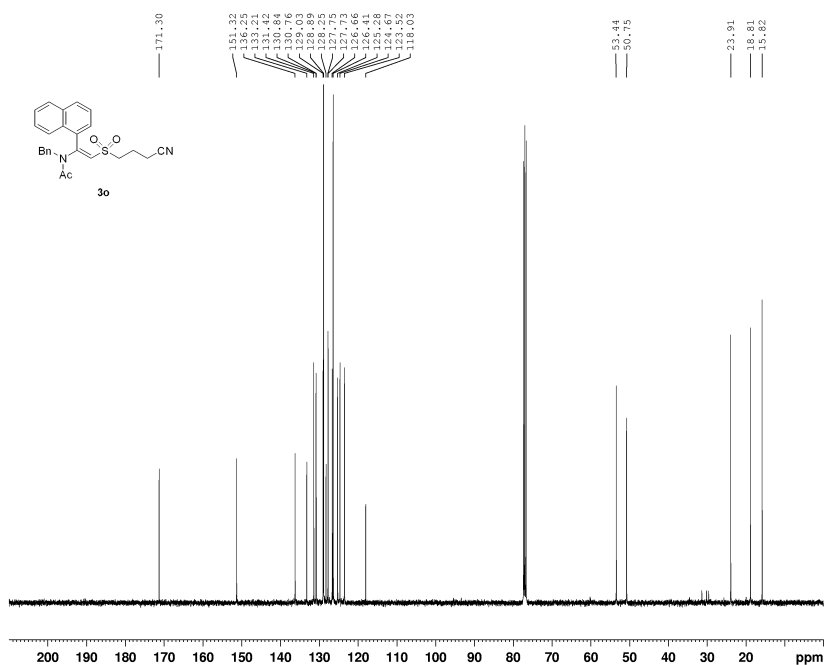

NAME txd 3o C  
 EXPNO 1  
 PROCNO 1  
 Date\_ 20210110  
 Time 11.27  
 INSTRUM spect  
 FREQHU 5 nm PABBO 807  
 PULPROG zg30  
 TD 65336  
 SOLVENT CDCl3  
 NS 4  
 DS 4  
 SWH 24038.461 Hz  
 FIDRES 1.364798 Hz  
 AQ 1.363198 sec  
 RG 202.96  
 DW 20.800 usec  
 DE 6.30 usec  
 TR 298.4 K  
 D1 2.80000000 sec  
 D11 0.33000000 sec  
 TDO 1  
 ===== CHANNEL f1 =====  
 SFO1 100.6228293 MHz  
 NUC1 13C  
 P1 10.00 usec  
 SI 32768  
 SF 100.6127795 MHz  
 WDW EM  
 SSB 0  
 LB 1.00 Hz  
 GB 0  
 PC 1.40

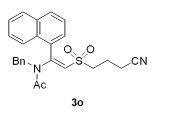

(E)-N-benzyl-N-(2-((3-cyanopropyl)sulfonyl)-1-(thiophen-3-yl)vinyl)acetamide (**3p**)

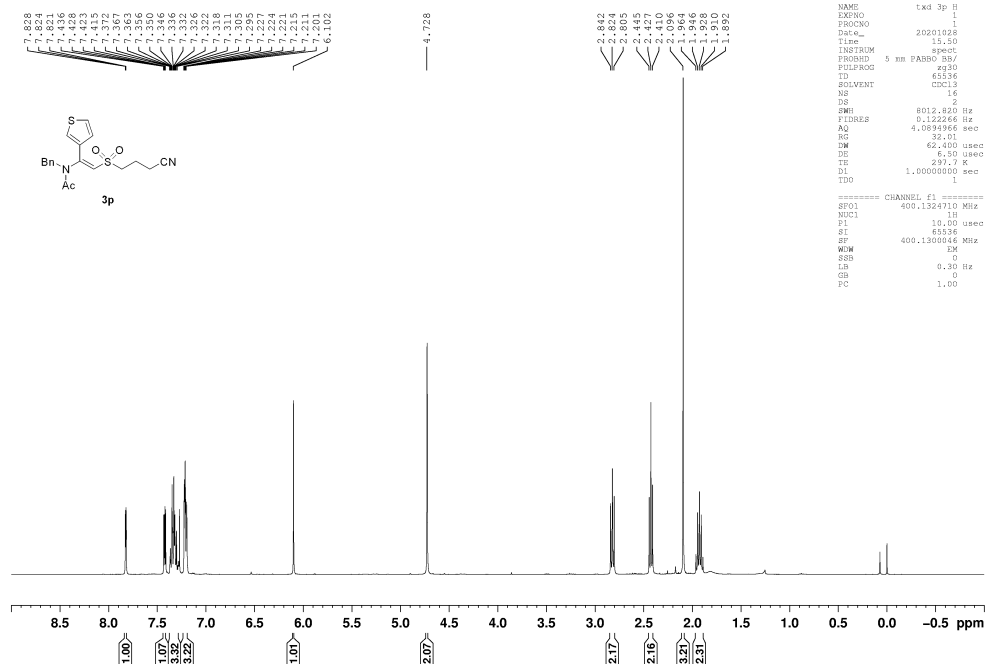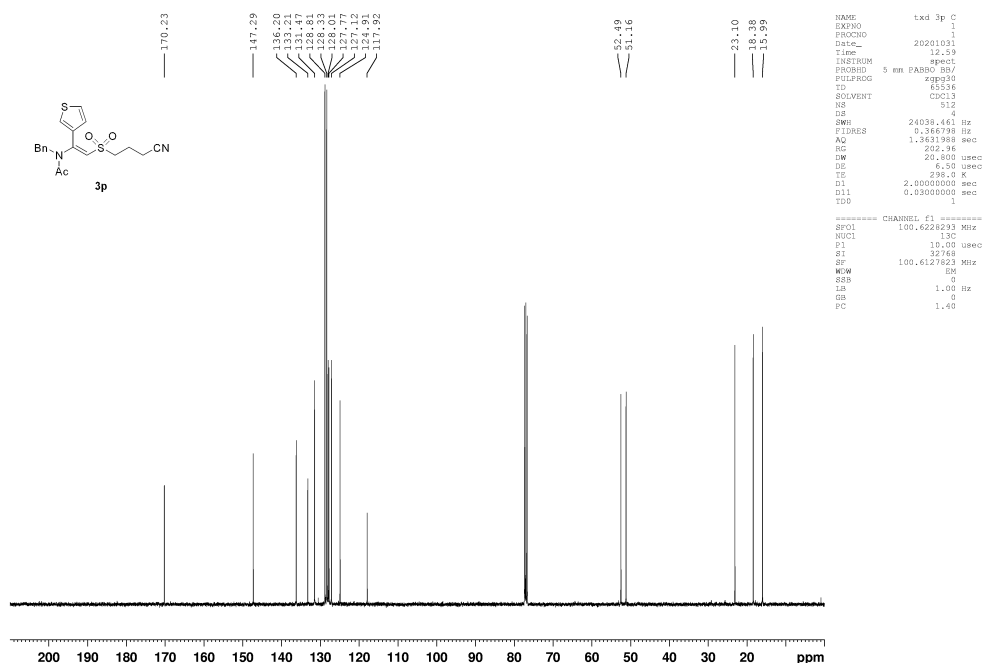





(E)-N-benzyl-N-(2-((3-cyano-2-phenylpropyl)sulfonyl)-1-phenylvinyl)acetamide (**3r**)

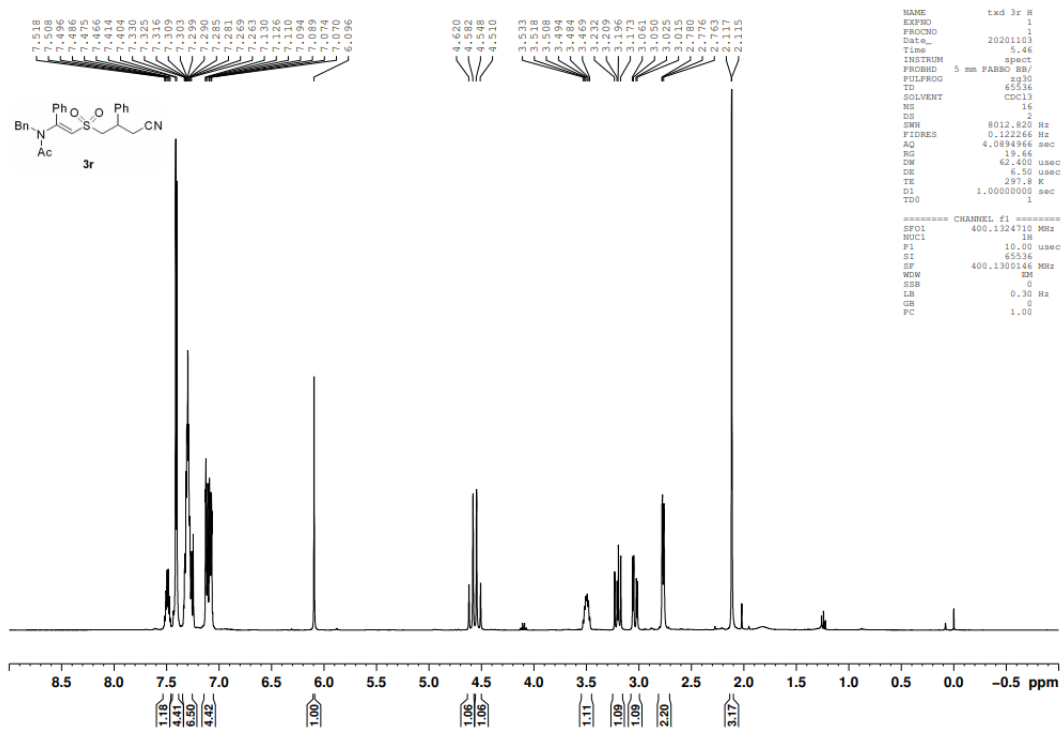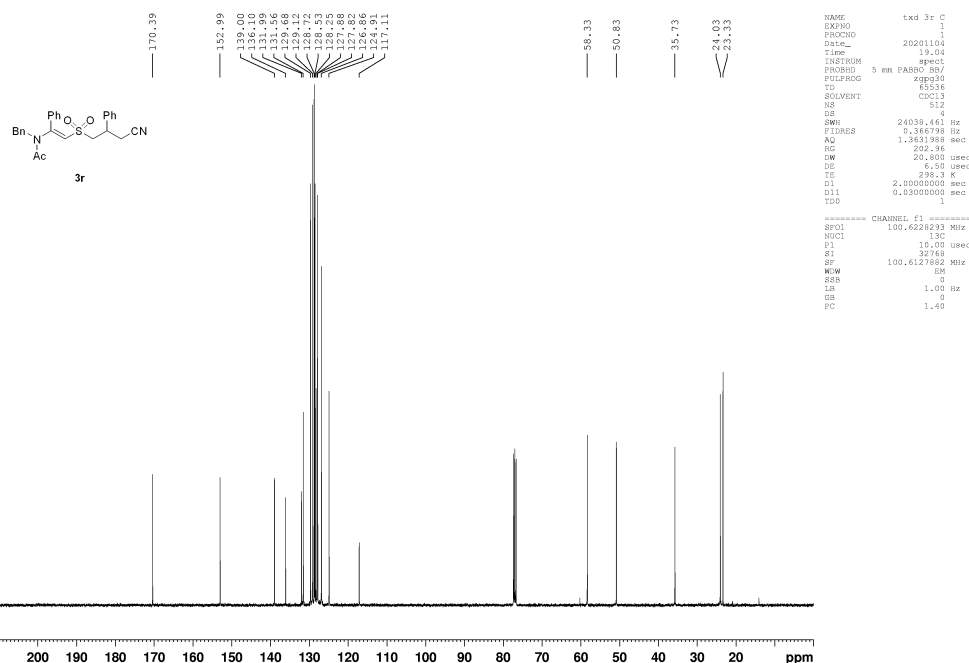

(E)-N-benzyl-N-(2-((2-(benzyloxy)-3-cyanopropyl)sulfonyl)-1-phenylvinyl)acetamide  
**(3s)**

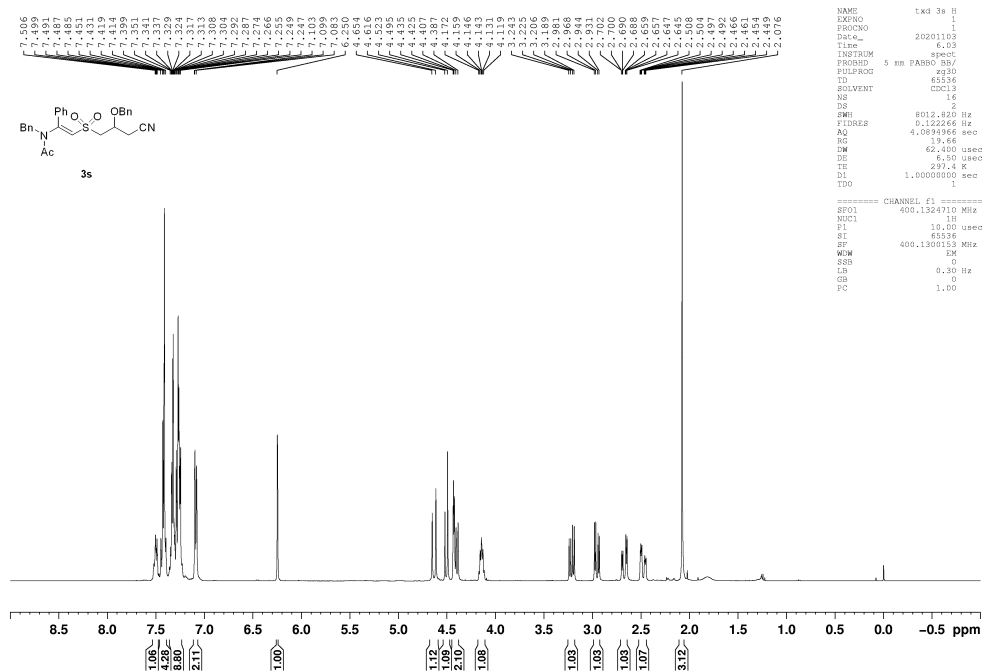

```

NAME      txd 3s H
EXPNO    1
PROCNO   1
Date_    20201103
Time     6.03
INSTRUM  spect
PROBHD   5 mm PABBO BB/
PULPROG  zgpg30
TD        65536
SOLVENT  CDCl3
NS        15
DS        4
SWH       8012.826 Hz
FIDRES   0.122266 Hz
AQ        4.0890966 sec
RG         19.86
DM         62.600 usec
DE         6.50 usec
TE        297.4 K
D1        1.00000000 sec
TDD       1
===== CHANNEL f1 =====
SFO1     400.1324710 MHz
NUC1      1H
P1        10.00 usec
SI        65536
SF        400.1300015 MHz
WDM       EM
SFB        0
LB         0.30 Hz
GB         0
PC         1.00
    
```

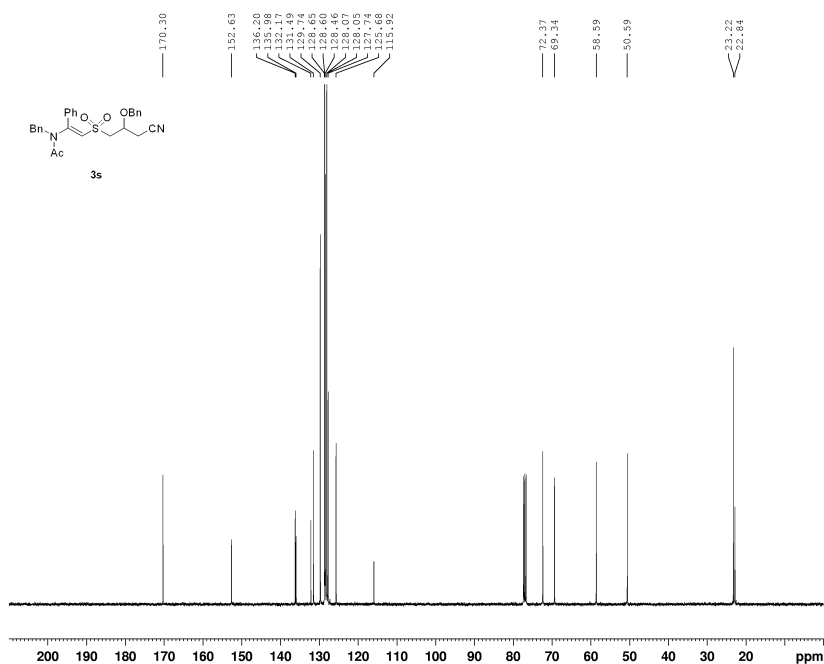

```

NAME      txd 3s C
EXPNO    1
PROCNO   1
Date_    20201104
Time     21.12
INSTRUM  spect
PROBHD   5 mm PABBO BB/
PULPROG  zgpg30
TD        65536
SOLVENT  CDCl3
NS        12
DS        4
SWH       24038.461 Hz
FIDRES   0.386798 Hz
AQ        1.3631988 sec
RG         202.96
DM         23.800 usec
DE         6.50 usec
TE        298.1 K
D1        2.00000000 sec
D11       0.03000000 sec
TDD       1
===== CHANNEL f1 =====
SFO1     100.6228293 MHz
NUC1      13C
P1        10.00 usec
SI        32768
SF        100.6127676 MHz
WDM       EM
SFB        0
LB         1.00 Hz
GB         0
PC         1.40
    
```

Methyl(E)-3-((2-(N-benzylacetamido)-2-phenylvinyl)sulfonyl)-2-(cyanomethyl)prop-anoate (**3t**)

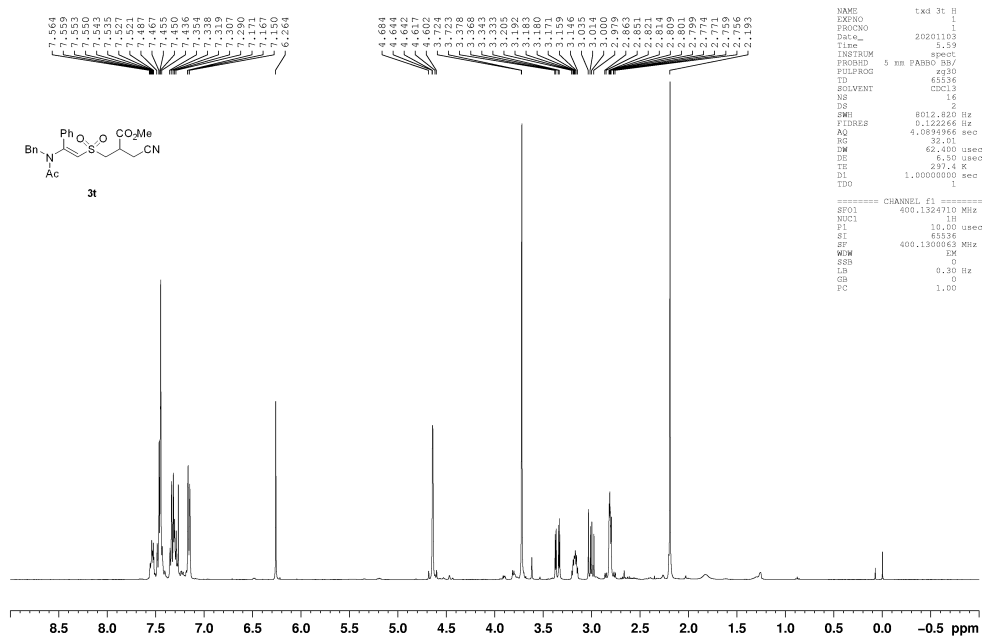

```

NAME      txd 3t H
EXPNO    1
PROCNO   1
Date_    20201103
Time     5.59
INSTRUM  spect
PROBHD   5 mm BBO BB/
PULPROG  zgpg30
TD       65536
SOLVENT  CDCl3
NS       4
DS       4
SWH      8012.820 Hz
FIDRES   0.122266 Hz
AQ       4.0893966 sec
RG       32.01
DM       62.400 usec
DE       6.50 usec
TE       297.4 K
D1       1.0000000 sec
TDD      1
===== CHANNEL f1 =====
SFO1     400.1324710 MHz
NUC1     1H
P1       10.00 usec
SI       65536
SF       400.1300062 MHz
WDM      EM
SFO2     0
LB       0.30 Hz
GB       0
PC       1.00
    
```

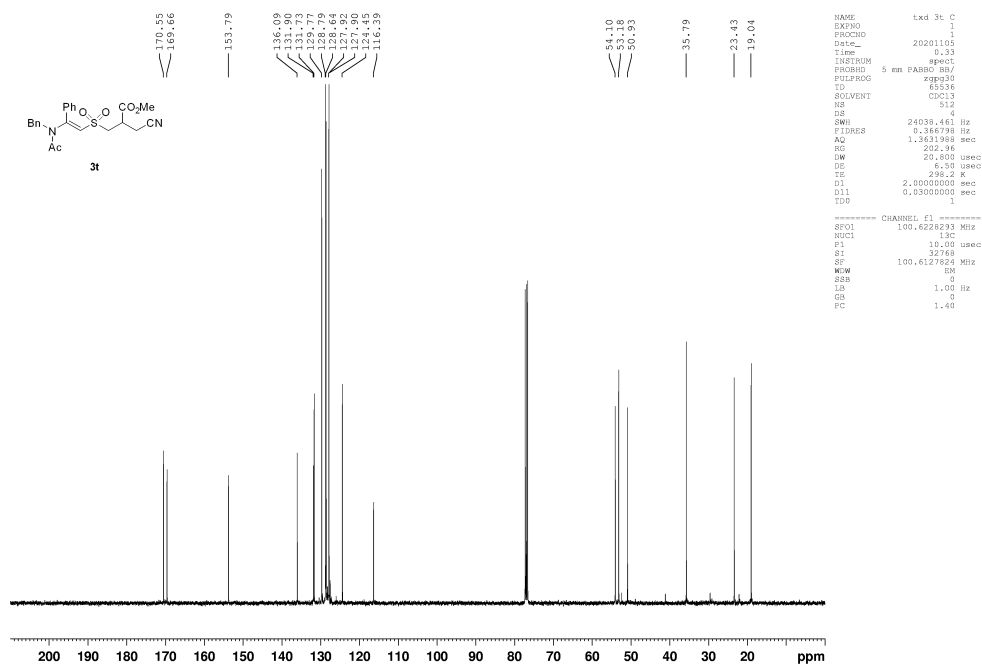

```

NAME      txd 3t C
EXPNO    1
PROCNO   1
Date_    20201103
Time     0.33
INSTRUM  spect
PROBHD   5 mm BBO BB/
PULPROG  zgpg30
TD       65536
SOLVENT  CDCl3
NS       4
DS       4
SWH      24038.461 Hz
FIDRES   0.386798 Hz
AQ       1.3631988 sec
RG       202.96
DM       23.800 usec
DE       6.50 usec
TE       298.2 K
D1       2.0000000 sec
D11      0.0300000 sec
TDD      1
===== CHANNEL f1 =====
SFO1     100.6228293 MHz
NUC1     13C
P1       10.00 usec
SI       32768
SF       100.6127624 MHz
WDM      EM
SFO2     0
LB       1.00 Hz
GB       0
PC       1.40
    
```

*tert*-butyl(E)-3-((2-(*N*-benzylacetamido)-2-phenylvinyl)sulfonyl)-2-(cyanomethyl)propanoate (**3u**)

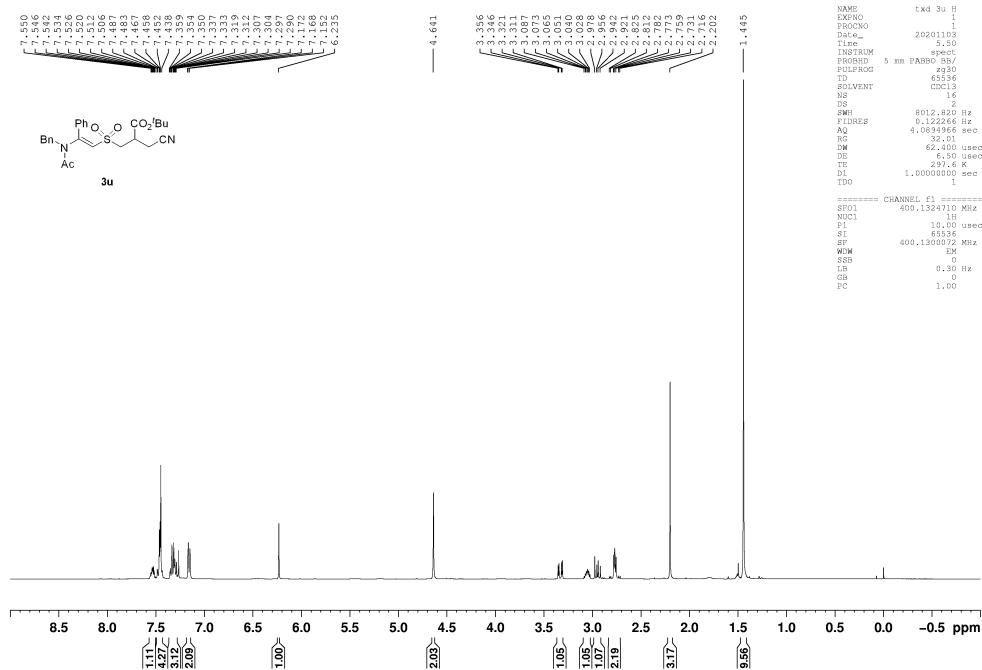

```

NAME      txd 3u H
EXPNO    1
PROCNO   1
Date_    20201104
Time     19.36
INSTRUM  spect
PROBHD   5 mm BBOBO BB/
PULPROG  zgpg30
TD        65536
SOLVENT  CDCl3
NS        4
DS        4
SWH       8012.820 Hz
FIDRES   0.122266 Hz
AQ        4.0393966 sec
RG         32.01
DM        62.400 usec
DE         6.50 usec
TE        297.6 K
D1        1.0000000 sec
TD0       1
===== CHANNEL f1 =====
SFO1     400.1324710 MHz
NUC1      1H
P1        10.00 usec
SI        65536
SF        400.1300000 MHz
WDM       EM
SFB        0
LB         0.30 Hz
GB         0
PC         1.00
    
```

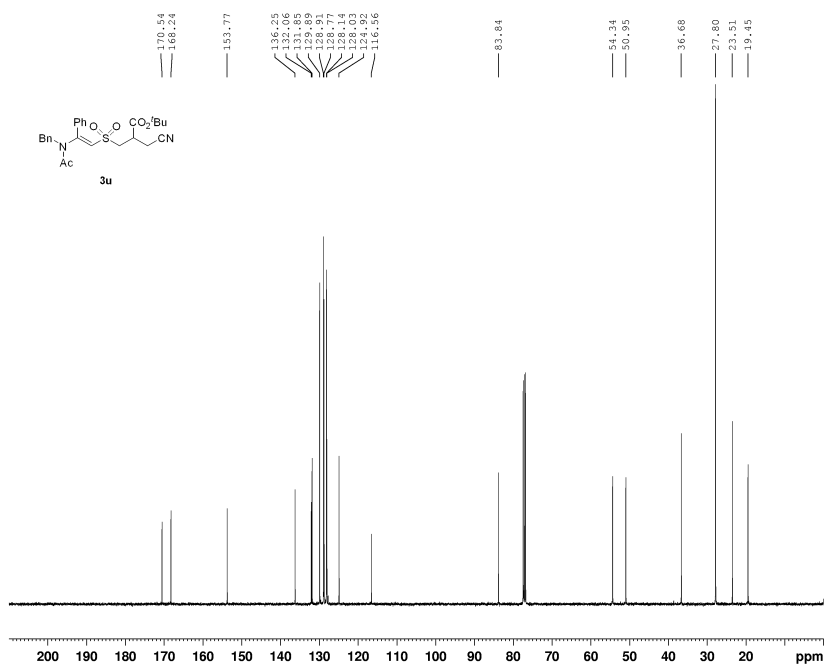

```

NAME      txd 3u C
EXPNO    1
PROCNO   1
Date_    20201104
Time     19.36
INSTRUM  spect
PROBHD   5 mm BBOBO BB/
PULPROG  zgpg30
TD        65536
SOLVENT  CDCl3
NS        4
DS        4
SWH       24038.461 Hz
FIDRES   0.366798 Hz
AQ        1.3631988 sec
RG         202.96
DM        23.800 usec
DE         6.50 usec
TE        298.0 K
D1        2.0000000 sec
D11       0.0300000 sec
TD0       1
===== CHANNEL f1 =====
SFO1     100.6228293 MHz
NUC1      13C
P1        10.00 usec
SI        32768
SF        100.6127690 MHz
WDM       EM
SFB        0
LB         1.00 Hz
GB         0
PC         1.40
    
```

(E)-N-benzyl-N-(2-((3-(benzyloxy)-2-(cyanomethyl)propyl)sulfonyl)-1-phenylvinyl)acetamide (**3v**)

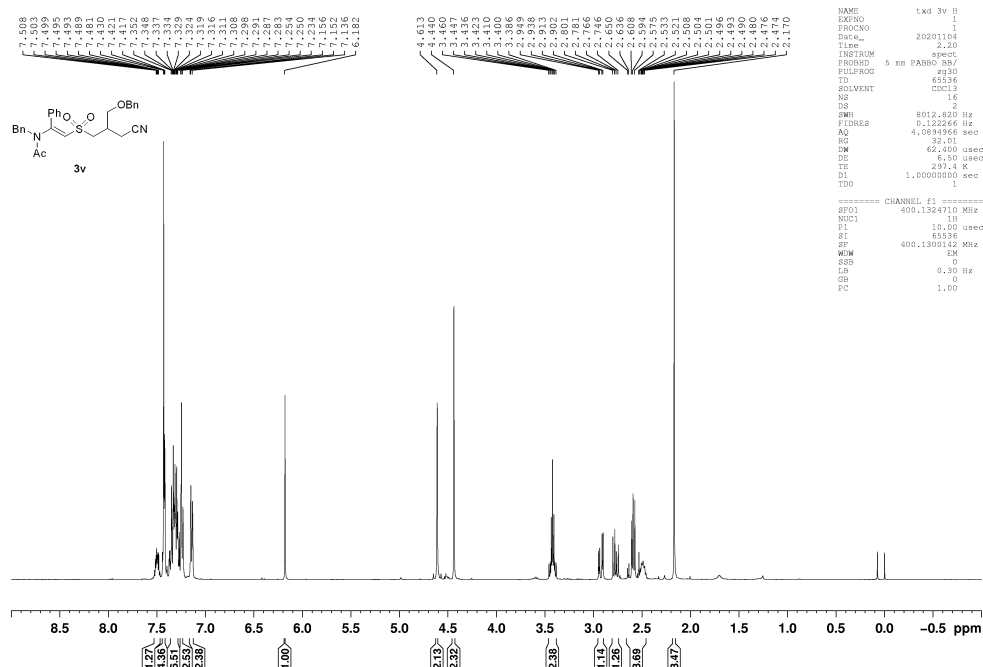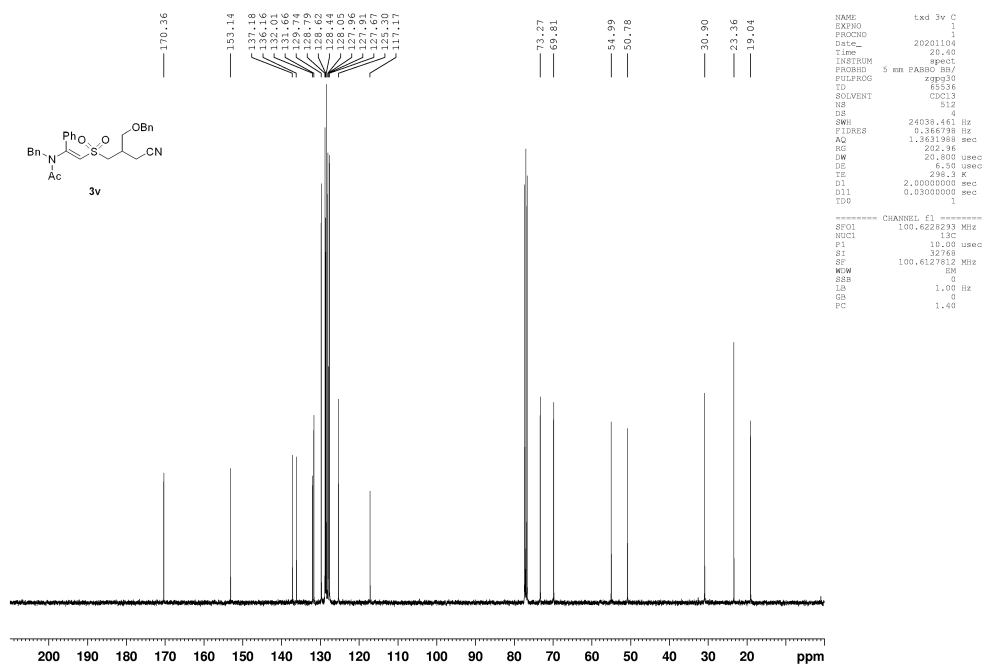

Supplement: d0qo01551b1.pdf [file d0qo01551b1.pdf]
